# Supplementary material
Source: ML conference proceedings conference paper supplement (https://openreview.net/forum?id=deaHiTb6Cu)
Supplement: supplementary_material [file attachment]

---

# Fast Exact Leverage Score Sampling from Khatri-Rao Products with Applications to Tensor Decomposition

---

Anonymous Author(s)

Affiliation

Address

email

## Abstract

1 We present a data structure to randomly sample rows from the Khatri-Rao product  
2 of several matrices according to the exact distribution of its leverage scores. Our  
3 proposed sampler draws each row in time logarithmic in the height of the Khatri-  
4 Rao product and quadratic in its column count, with persistent space overhead  
5 at most the size of the input matrices. As a result, it tractably draws samples  
6 even when the matrices forming the Khatri-Rao product have tens of millions  
7 of rows each. When used to sketch the linear least squares problems arising in  
8 CANDECOMP / PARAFAC decomposition, our method achieves lower asymptotic  
9 complexity per solve than recent state-of-the-art methods. Experiments on billion-  
10 scale sparse tensors and synthetic data validate our theoretical claims, with our  
11 algorithm achieving higher accuracy than competing methods as the decomposition  
12 rank grows.

## 13 1 Introduction

14 The Khatri-Rao product (KRP, denoted  $\odot$ ) is the column-wise Kronecker product of two matrices, and  
15 it appears in diverse applications across numerical analysis and machine learning [13]. We examine  
16 overdetermined linear least squares problems of the form  $\min_X \|AX - B\|_F$ , where the design  
17 matrix  $A = U_1 \odot \dots \odot U_N$  is the Khatri-Rao product of matrices  $U_j \in \mathbb{R}^{|I_j| \times R}$ . These problems  
18 appear prominently in signal processing [21], compressed sensing [29], approximate second-order  
19 gradient descent [18, 17], and alternating least squares (ALS) CANDECOMP / PARAFAC (CP)  
20 tensor decomposition [11]. In this work, we focus on the case where  $A$  has moderate column count  
21 (several hundred at most). Despite this, the problem remains formidable because the height of  $A$  is  
22  $\prod_{j=1}^N |I_j|$ . For row counts  $|I_j|$  in the millions, it is intractable to even materialize  $A$  explicitly.

23 Several recently-proposed randomized sketching algorithms can approximately solve least squares  
24 problems with Khatri-Rao product design matrices [10, 12, 15, 27]. These methods apply a  
25 sketching operator  $S$  to the design and data matrices to solve the reduced least squares problem  
26  $\min_{\tilde{X}} \|SA\tilde{X} - SB\|_F$ , where  $S$  has far fewer rows than columns. For appropriately chosen  $S$ , the  
27 residual of the downsampled system falls within a specified tolerance  $\varepsilon$  of the optimal residual with  
28 high probability  $1 - \delta$ . In this work, we constrain  $S$  to be a *sampling matrix* that selects and reweights  
29 a subset of rows from both  $A$  and  $B$ . When the rows are selected according to the distribution of  
30 *statistical leverage scores* on the design matrix  $A$ , only  $O(R/(\varepsilon\delta))$  samples are required (subject to  
31 the assumptions at the end of section 2.1). The challenge, then, is to efficiently sample according to  
32 the leverage scores when  $A$  has Khatri-Rao structure.

33 We propose a leverage-score sampler for the Khatri-Rao product of matrices with tens of millions of  
34 rows each. After construction, our sampler draws each row in time quadratic in the column count, but

logarithmic in the total row count of the Khatri-Rao product. Our core contribution is the following theorem.

**Theorem 1.1** (Efficient Khatri-Rao Product Leverage Sampling). *Given  $U_1, \dots, U_N$  with  $U_j \in \mathbb{R}^{|I_j| \times R}$ , there exists a data structure satisfying the following:*

1. *The data structure has construction time  $O\left(\sum_{j=1}^N |I_j| R^2\right)$  and requires additional storage space  $O\left(\sum_{j=1}^N |I_j| R\right)$ . If a single entry in a matrix  $U_j$  changes, it can be updated in time  $O(R \log(|I_j|/R))$ . If the entire matrix  $U_j$  changes, it can be updated in time  $O(|I_j| R^2)$ .*
2. *The data structure produces  $J$  samples from the Khatri-Rao product  $U_1 \odot \dots \odot U_N$  according to the exact leverage score distribution on its rows in time*

$$O\left(NR^3 + J \sum_{k=1}^N (R^2 \log \max(|I_k|, R))\right)$$

*using  $O(R^3)$  scratch space. The structure can also draw samples from the Khatri-Rao product of all matrices excluding  $U_j$  for any index  $j$ .*

The efficient update property and ability to exclude one matrix are important in CP decomposition. When the inputs  $U_1, \dots, U_N$  are sparse, an analogous data structure with  $O\left(R \sum_{j=1}^N \text{nnz}(U_j)\right)$  construction time and  $O\left(\sum_{j=1}^N \text{nnz}(U_j)\right)$  storage space exists with identical sampling time. Since our applications deal with dense inputs, we defer the proof to Appendix A.8. Combined with error guarantees for leverage-score sampling, we achieve an algorithm for alternating least squares CP decomposition with asymptotic complexity lower than recent state-of-the-art methods (see Table 1).

Our method provides the most practical benefit on sparse tensors with massive mode sizes. As a result, we test our sampler on sparse tensor CP decomposition via alternating least squares. On the Amazon tensor with 1.8 billion nonzeros, our algorithm STS-CP achieves 5.7% higher fit for a rank 100 decomposition compared to competing method CP-ARLS-LEV, with only 2% higher average runtime at the same sample count. Even when CP-ARLS-LEV uses three times as many samples and 49% more runtime compared to our STS-CP, STS-CP still exhibits 1.3% higher fit (see Figure 8a in Appendix A.12.3).

Table 1: Complexity of recent methods for  $N$ -dimensional dense tensor CP decomposition via alternating least squares. Factors involving  $\log R$  and  $\log(1/\delta)$  are hidden. See A.1 for details.

| METHOD               | COMPLEXITY PER ITERATION                                 |
|----------------------|----------------------------------------------------------|
| CP-ALS [11]          | $N(N+I)I^{N-1}R$                                         |
| CP-ARLS-LEV [12]     | $N(R+I)R^N/(\varepsilon\delta)$                          |
| TNS-CP [16]          | $N^3IR^3/(\varepsilon\delta)$                            |
| GAUSSIAN TNE [14]    | $N^2(N^{1.5}R^{3.5}/\varepsilon^3 + IR^2)/\varepsilon^2$ |
| <b>STS-CP (OURS)</b> | $N(NR^3 \log I + IR^2)/(\varepsilon\delta)$              |

## 2 Preliminaries and Related Work

**Notation.** We use Matlab notation  $A[i, :]$ ,  $A[:, i]$  to index rows, resp. columns, of matrices. For consistency, we use the convention that  $A[i, :]$  is a row vector. Hence  $A[i, :]^\top A[i, :]$  denotes an outer product, not an inner product. We use  $\cdot$  for standard matrix multiplication,  $\otimes$  as the elementwise product,  $\otimes$  to denote the Kronecker product, and  $\odot$  for the Khatri-Rao product. See Appendix A.2 for a definition of each operation. Given matrices  $A \in \mathbb{R}^{m_1 \times n}$ ,  $B \in \mathbb{R}^{m_2 \times n}$ , the  $j$ 'th column of the Khatri-Rao product  $A \odot B \in \mathbb{R}^{m_1 m_2 \times n}$  is the Kronecker product  $A[:, j] \otimes B[:, j]$ .

We use angle brackets  $\langle \cdot, \dots, \cdot \rangle$  to denote a **generalized inner product**. For identically-sized vectors / matrices, it returns the sum of all entries in their elementwise product. For  $A, B, C \in \mathbb{R}^{m \times n}$ ,

$$\langle A, B, C \rangle := \sum_{i=1, j=1}^{m, n} A[i, j] B[i, j] C[i, j].$$

68 Finally,  $M^+$  denotes the pseudoinverse of matrix  $M$ .

## 69 2.1 Sketched Linear Least Squares

70 A variety of random sketching operators  $S$  have been proposed to solve overdetermined least squares  
 71 problems  $\min_X \|AX - B\|_F$  when  $A$  has no special structure [28, 2]. When  $A$  has Khatri-Rao  
 72 product structure, prior work has focused on *sampling* matrices [4, 12], which have a single nonzero  
 73 entry per row, operators composed of fast Fourier / trigonometric transforms [10], or Countsketch-  
 74 type operators [25, 1]. For tensor decomposition, however, the matrix  $B$  may be sparse or implicitly  
 75 specified as a black-box function. When  $B$  is sparse, Countsketch-type operators still require the  
 76 algorithm to iterate over all nonzero values in  $B$ . As Larsen and Kolda [12] note, operators similar  
 77 to the FFT induce fill-in when applied to a sparse matrix  $B$ , destroying the benefits of sketching.  
 78 Similar difficulties arise when  $B$  is implicitly specified. This motivates our decision to focus on  
 79 sampling operators, which only touch a subset of entries from  $B$ . Let  $\hat{x}_1, \dots, \hat{x}_J$  be a selection of  $J$   
 80 indices for the rows of  $A \in \mathbb{R}^{I \times R}$ , sampled i.i.d. according to a probability distribution  $q_1, \dots, q_I$ .  
 81 The associated sampling matrix  $S \in \mathbb{R}^{J \times I}$  is specified by

$$S[i, j] = \begin{cases} \frac{1}{\sqrt{Jq_j}}, & \text{if } \hat{x}_i = j \\ 0, & \text{otherwise} \end{cases}$$

82 where the weight of each nonzero entry corrects bias induced by sampling. When the probabilities  $q_j$   
 83 are proportional to the *leverage scores* of the rows of  $A$ , strong guarantees apply to the solution of  
 84 the downsampled problem.

85 **Leverage Score Sampling.** The leverage scores of a matrix assign a measure of importance to each  
 86 of its rows. The leverage score of row  $i$  from matrix  $A \in \mathbb{R}^{I \times R}$  is given by

$$\ell_i = A[i, :] (A^\top A)^+ A[i, :]^\top \quad (1)$$

87 for  $1 \leq i \leq I$ . Leverage scores can be expressed equivalently as the squared row norms of the matrix  
 88  $Q$  in any reduced  $QR$  factorization of  $A$  [6]. The sum of all leverage scores is the rank of  $A$  [28].  
 89 Dividing the scores by their sum, we induce a probability distribution on the rows used to generate a  
 90 sampling matrix  $S$ . The next theorem has appeared in several works, and we take the form given by  
 91 Malik et al. [16]. For an appropriate sample count, it guarantees that the residual of the downsampled  
 92 problem is close to the residual of the original problem.

93 **Theorem 2.1** (Guarantees for Leverage Score Sampling). *Given  $A \in \mathbb{R}^{I \times R}$  and  $\varepsilon, \delta \in (0, 1)$ , let  $S \in$   
 94  $\mathbb{R}^{J \times I}$  be a leverage score sampling matrix for  $A$ . Further define  $\tilde{X} = \arg \min_X \|SAX - SB\|_F$ .  
 95 If  $J \gtrsim R \max(\log(R/\delta), 1/(\varepsilon\delta))$ , then with probability at least  $1 - \delta$  it holds that*

$$\|A\tilde{X} - B\|_F \leq (1 + \varepsilon) \min_X \|AX - B\|_F.$$

96  
 97 For the applications considered in this work,  $R$  ranges up to a few hundred. As  $\varepsilon$  and  $\delta$  tend to 0  
 98 with fixed  $R$ ,  $1/(\varepsilon\delta)$  dominates  $\log(R/\delta)$ . Hence, we assume that the minimum sample count  $J$  to  
 99 achieve the guarantees of the theorem is  $O(R/(\varepsilon\delta))$ .

## 100 2.2 Prior Work

101 **Khatri-Rao Product Leverage Score Sampling.** Well-known sketching algorithms exist to quickly  
 102 estimate the leverage scores of dense matrices [6]. These algorithms are, however, intractable for  
 103  $A = U_1 \odot \dots \odot U_N$  due to the height of the Khatri-Rao product. Cheng et al. [4] instead approximate  
 104 each score as a product of leverage scores associated with each matrix  $U_j$ . Larsen and Kolda [12]  
 105 propose CP-ARLS-LEV, which uses a similar approximation and combines random sampling with a  
 106 deterministic selection of high-probability indices. Both methods were presented in the context of CP  
 107 decomposition. To sample from the Khatri-Rao product of  $N$  matrices, both require  $O(R^N/(\varepsilon\delta))$   
 108 samples to achieve the  $(\varepsilon, \delta)$  guarantee on the residual of each least squares solution. These methods  
 109 are simple to implement and perform well when the Khatri-Rao product has column count up to 20-30.  
 110 On the other hand, they suffer from high sample complexity as  $R$  and  $N$  increase. The TNS-CP  
 111 algorithm by Malik et al. [16] samples from the exact leverage score distribution, thus requiring only  
 112  $O(R/(\varepsilon\delta))$  samples per least squares solve. Unfortunately, it requires time  $O\left(\sum_{j=1}^N |I_j| R^2\right)$  to  
 113 draw each sample.

**Comparison to Woodruff and Zandieh.** The most comparable results to ours appear in work by Woodruff and Zandieh [27], who detail an algorithm for approximate ridge leverage-score sampling for the Khatri-Rao product in near input-sparsity time. Their work relies on a prior oblivious method by Ahle et al. [1], which sketches a Khatri-Rao product using a sequence of Countsketch / OSNAP operators arranged in a tree. Used in isolation to solve a linear least squares problem, the tree sketch construction time scales as  $O\left(\frac{1}{\varepsilon} \sum_{j=1}^N \text{nnz}(U_j)\right)$  and requires an embedding dimension quadratic in  $R$  to achieve the  $(\varepsilon, \delta)$  solution-quality guarantee. Woodruff and Zandieh use a collection of these tree sketches, each with carefully-controlled approximation error, to design an algorithm with linear runtime dependence on the column count  $R$ . On the other hand, the method exhibits  $O(N^7)$  scaling in the number of matrices involved, has  $O(\varepsilon^{-4})$  scaling in terms of the desired accuracy, and relies on a sufficiently high ridge regularization parameter. Our data structure instead requires construction time quadratic in  $R$ . In exchange, we use distinct methods to design an efficiently-updatable sampler with runtime linear in both  $N$  and  $\varepsilon^{-1}$ . These properties are attractive when the column count  $R$  is below several thousand and when error as low as  $\varepsilon \approx 10^{-3}$  is needed in the context of an iterative solver (see Figure 5). Moreover, the term  $O(R^2 \sum_{j=1}^N |I_j|)$  in our construction complexity arises from symmetric rank- $k$  updates, a highly-optimized BLAS3 kernel on modern CPU and GPU architectures. Appendix A.3 provides a more detailed comparison between the two approaches.

**Kronecker Regression.** Kronecker regression is distinct (but closely related) problem to the one we consider. Here,  $A = U_1 \otimes \dots \otimes U_N$  and the matrices  $U_i$  have potentially distinct column counts  $R_1, \dots, R_N$ . Similar techniques, including leverage-score sampling [5, 7] and dynamically-updatable tree-sketches [19], yield efficient sketched solutions, but none of these results apply directly in our case due to the distinct properties of Kronecker and Khatri-Rao products.

### 3 An Efficient Khatri-Rao Leverage Sampler

Without loss of generality, we will prove part 2 of Theorem 1.1 for the case where  $A = U_1 \odot \dots \odot U_N$ ; the case that excludes a single matrix follows by reindexing matrices  $U_k$ . We further assume that  $A$  is a nonzero matrix, though it may be rank-deficient. Similar to prior sampling works [15, 27], our algorithm will draw a single sample from the Khatri-Rao product by sampling a row from each of  $U_1, U_2, \dots$  in an autoregressive fashion, returning their elementwise product. This means that the row from each matrix  $U_j$  is drawn conditioned on prior draws from  $U_1, \dots, U_{j-1}$ .

Let us index each row of  $A$  by a tuple  $(i_1, \dots, i_N) \in I_1 \times \dots \times I_N$ . Equation (1) gives

$$\ell_{i_1, \dots, i_N} = A[(i_1, \dots, i_N), :] (A^\top A)^+ A[(i_1, \dots, i_N), :]^\top. \quad (2)$$

For  $1 \leq k \leq N$ , define  $G_k := U_k^\top U_k$  and  $G := \left(\bigotimes_{k=1}^N G_k\right)$ ; it is a well-known fact that  $G = A^\top A$  [11]. For a single row sample from  $A$ , let  $\hat{s}_1, \dots, \hat{s}_N$  be random variables for the draws from multi-index set  $I_1 \times \dots \times I_N$  according to the leverage score distribution. Assume, for some  $k$ , that we have already sampled an index from each of  $I_1, \dots, I_{k-1}$ , and that the first  $k-1$  random variables take values  $\hat{s}_1 = s_1, \dots, \hat{s}_{k-1} = s_{k-1}$ . We abbreviate the latter condition as  $\hat{s}_{<k} = s_{<k}$ . To sample from  $I_k$ , we seek the distribution of  $\hat{s}_k$  conditioned on  $\hat{s}_1, \dots, \hat{s}_{k-1}$ . Define  $h_{<k}$  as the transposed elementwise product<sup>1</sup> of rows already sampled:

$$h_{<k} := \bigotimes_{i=1}^{k-1} U_i[s_i, :]^\top. \quad (3)$$

Also define  $G_{>k}$  as

$$G_{>k} := G^+ \bigotimes_{i=k+1}^N G_i. \quad (4)$$

Then the following theorem provides the conditional distribution of  $\hat{s}_k$ .

**Theorem 3.1** (Malik 2022, Adapted). *For any  $s_k \in I_k$ ,*

$$\begin{aligned} p(\hat{s}_k = s_k \mid \hat{s}_{<k} = s_{<k}) &= C^{-1} \langle h_{<k} h_{<k}^\top, U_k[s_k, :]^\top U_k[s_k, :], G_{>k} \rangle \\ &:= q_{h_{<k}, U_k, G_{>k}}[s_k] \end{aligned} \quad (5)$$

<sup>1</sup>For  $a > b$ , assume that  $\bigotimes_{i=a}^b (\dots)$  produces a vector / matrix filled with ones.

154 where  $C = \langle h_{<k} h_{<k}^\top, U_k^\top U_k, G_{>k} \rangle$  is nonzero.

155 We include the derivation of Theorem 3.1 from Equation (2) in Appendix A.4. Computing all entries  
 156 of the probability vector  $q_{h_{<k}, U_k, G_{>k}}$  would cost  $O(|I_j| R^2)$  per sample, too costly when  $U_j$  has  
 157 millions of rows. It is likewise intractable (in preprocessing time and space complexity) to precompute  
 158 probabilities for every possible conditional distribution on the rows of  $U_j$ , since the conditioning  
 159 random variable has  $\prod_{k=1}^{j-1} |I_k|$  potential values. Our key innovation is a data structure to sample from  
 160 a discrete distribution of the form  $q_{h_{<k}, U_k, G_{>k}}$  without materializing all of its entries or incurring  
 161 superlinear cost in either  $N$  or  $\varepsilon^{-1}$ . We introduce this data structure in the next section and will apply  
 162 it twice in succession to get the complexity in theorem 1.1.

### 163 3.1 Efficient Sampling from $q_{h,U,Y}$

164 We introduce a slight change of notation in this section to simplify the problem and generalize our  
 165 sampling lemma. Let  $h \in \mathbb{R}^R, Y \in \mathbb{R}^{R \times R}$  be a vector and a positive semidefinite (p.s.d.) matrix,  
 166 respectively. Our task is to sample  $J$  rows from a matrix  $U \in \mathbb{R}^{I \times R}$  according to the distribution

$$q_{h,U,Y}[s] := C^{-1} \langle h h^\top, U^\top [s, :] U [s, :], Y \rangle \quad (6)$$

167 provided the normalizing constant  $C = \langle h h^\top, U^\top U, Y \rangle$ , is nonzero. We impose that all  $J$  rows are  
 168 drawn with the same matrices  $Y$  and  $U$ , but potentially distinct vectors  $h$ . The following lemma  
 169 establishes that an efficient sampler for this problem exists.

170 **Lemma 3.2** (Efficient Row Sampler). *Given matrices  $U \in \mathbb{R}^{I \times R}, Y \in \mathbb{R}^{R \times R}$  with  $Y$  p.s.d., there*  
 171 *exists a data structure parameterized by positive integer  $F$  that satisfies the following:*

- 172 1. *The structure has construction time  $O(I R^2)$  and storage requirement  $O(R^2 \lceil I/F \rceil)$ . If*  
 173  *$I < F$ , the storage requirement drops to  $O(1)$ .*
- 174 2. *After construction, the data structure can produce a sample according to the distribution*  
 175  *$q_{h,U,Y}$  in time  $O(R^2 \log \lceil I/F \rceil + F R^2)$  for any vector  $h$ .*
- 176 3. *If  $Y$  is a rank-1 matrix, the time per sample drops to  $O(R^2 \log \lceil I/F \rceil + F R)$ .*

177 This data structure relies on an adaptation of a  
 178 classic binary-tree inversion sampling technique  
 179 [20]. Consider a partition of the interval  $[0, 1]$   
 180 into  $I$  bins, the  $i$ 'th having width  $q_{h,U,Y}[i]$ . We  
 181 sample  $d \sim \text{Uniform}[0, 1]$  and return the index  
 182 of the containing bin. We locate the bin index  
 183 through a binary search terminated when at most  
 184  $F$  bins remain in the search space, which are  
 185 then scanned in linear time. Here,  $F$  is a tuning  
 186 parameter that we will use to control sampling  
 187 complexity and space usage.

188 We can regard the binary search as a walk down  
 189 a full, complete binary tree  $T_{I,F}$  with  $\lceil I/F \rceil$   
 190 leaves, the nodes of which store contiguous,  
 191 disjoint segments  $S(v) = \{S_0(v) \dots S_1(v)\} \subseteq \{0 \dots I\}$  of size at most  $F$ . The segment of each  
 192 internal node is the union of segments held by its children, and the root node holds  $\{1 \dots I\}$ .  
 193 Suppose that the binary search reaches node  $v$  with left child  $L(v)$  and maintains the interval  
 194  $[\text{low}, \text{high}] \subseteq [0, 1]^2$  as the remaining search space to explore. Then the search branches left in the  
 195 tree iff  $d < \text{low} + \sum_{i \in S(L(v))} q_{h,U,Y}[i]$ .

196 This branching condition can be evaluated efficiently if appropriate information is stored at each node  
 197 of the segment tree. Excluding the offset “low”, the branching threshold takes the form

$$\sum_{i \in S(v)} q_{h,U,Y}[i] = C^{-1} \langle h h^\top, \sum_{i \in S(v)} U[i, :]^\top U[i, :], Y \rangle := C^{-1} \langle h h^\top, G^v, Y \rangle. \quad (7)$$

198 Here, we call each matrix  $G^v \in \mathbb{R}^{R \times R}$  a *partial Gram matrix*. In time  $O(I R^2)$  and space  
 199  $O(R^2 \lceil I/F \rceil)$ , we can compute and cache  $G^v$  for each node of the tree to construct our data structure.

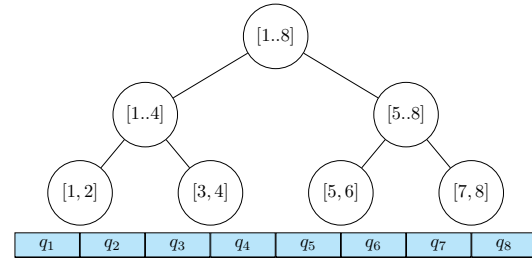

Figure 1: A segment tree  $T_{8,2}$  and probability distribution  $\{q_1, \dots, q_8\}$  on  $[1, \dots, 8]$ .

Each subsequent binary search costs  $O(R^2)$  time to evaluate Equation (7) at each of  $\log \lceil I/F \rceil$  internal nodes and  $O(FR^2)$  to evaluate  $q_{h,U,Y}$  at the  $F$  indices held by each leaf, giving point 2 of the lemma. This cost at each leaf node reduces to  $O(FR)$  in case  $Y$  is rank-1, giving point 3. A complete proof of this lemma appears in Appendix A.5.

### 3.2 Sampling from the Khatri-Rao Product

We face difficulties if we directly apply Lemma 3.2 to sample from the conditional distribution in Theorem 3.1. Because  $G_{>k}$  is not rank-1 in general, we must use point 2 of the lemma, where no selection of the parameter  $F$  allows us to simultaneously satisfy the space and runtime constraints of theorem 1.1. Selecting  $F = R$  results in cost  $O(R^3)$  per sample (violating the runtime requirement in point 2), whereas  $F = 1$  results in a superlinear storage requirement  $O(IR^2)$  (violating the space requirement in point 1, and becoming prohibitively expensive for  $I \geq 10^6$ ). To avoid these extremes, we break the sampling procedure into two stages. The first stage selects a 1-dimensional subspace spanned by an eigenvector of  $G_{>k}$ , while the second samples according to Theorem 3.1 after projecting the relevant vectors onto the selected subspace. Lemma 3.2 can be used for *both* stages, and the second stage benefits from point 3 to achieve better time and space complexity.

Below, we abbreviate  $q = q_{h_{<k}, U_k, G_{>k}}$  and  $h = h_{<k}$ . When sampling from  $I_k$ , observe that  $G_{>k}$  is the same for all samples. We compute a symmetric eigendecomposition  $G_{>k} = V\Lambda V^\top$ , where each column of  $V$  is an eigenvector of  $G_{>k}$  and  $\Lambda = \text{diag}((\lambda_u)_{u=1}^R)$  contains the eigenvalues along the diagonal. This allows us to rewrite entries of  $q$  as

$$q[s] = C^{-1} \sum_{u=1}^R \lambda_u \langle hh^\top, U_k[s, :]^\top U_k[s, :] V[:, u] V[:, u]^\top \rangle. \quad (8)$$

Define matrix  $W \in \mathbb{R}^{|I_k| \times R}$  elementwise by

$$W[t, u] := \langle hh^\top, U_k[t, :]^\top U_k[t, :] V[:, u] V[:, u]^\top \rangle$$

and observe that all of its entries are nonnegative. Since  $\lambda_u \geq 0$  for all  $u$  ( $G_{>k}$  is p.s.d.), we can write  $q$  as a mixture of probability distributions given by the normalized columns of  $W$ :

$$q = \sum_{u=1}^R w[u] \frac{W[:, u]}{\|W[:, u]\|_1},$$

where the vector  $w$  of nonnegative weights is given by  $w[u] = (C^{-1} \lambda_u \|W[:, u]\|_1)$ . Rewriting  $q$  in this form gives us the two stage sampling procedure: first sample a component  $u$  of the mixture according to the weight vector  $w$ , then sample an index in  $\{1..|I_k|\}$  according to the probability vector defined by  $W[:, u] / \|W[:, u]\|_1$ . Let  $\hat{u}_k$  be a random variable distributed according to the probability mass vector  $w$ . We have, for  $C$  taken from Theorem 3.1,

$$\begin{aligned} p(\hat{u}_k = u_k) &= C^{-1} \lambda_{u_k} \sum_{t=1}^{|I_k|} W[t, u_k] \\ &= C^{-1} \lambda_{u_k} \langle hh^\top, V[:, u_k] V[:, u_k]^\top, G_k \rangle \\ &= q_{h, \sqrt{\Lambda} V^\top, G_k}[u_k]. \end{aligned} \quad (9)$$

Hence, we can use point 2 of Lemma 3.2 with  $F = 1$  to sample a value for  $\hat{u}_k$  efficiently. Now, introduce a random variable  $\hat{t}_k$  with distribution conditioned on  $\hat{u}_k = u_k$  given by

$$p(\hat{t}_k = t_k \mid \hat{u}_k = u_k) := W[t_k, u_k] / \|W[:, u_k]\|_1. \quad (10)$$

This distribution is well-defined, since we suppose that  $\hat{u}_k = u_k$  occurs with nonzero probability  $e[u_k]$ , which implies that  $\|W[:, u_k]\|_1 \neq 0$ . Our remaining task is to efficiently sample from the distribution above. Below, we abbreviate  $\tilde{h} = V[:, u_k] \otimes h$  and derive

$$\begin{aligned} p(\hat{t}_k = t_k \mid \hat{u}_k = u_k) &= \frac{\langle hh^\top, U_k[t_k, :]^\top U_k[t_k, :] V[:, u_k] V[:, u_k]^\top \rangle}{\|W[:, u_k]\|_1} \\ &= \frac{\langle \tilde{h} \tilde{h}^\top, U_k[t_k, :]^\top U_k[t_k, :] [1] \rangle}{\|W[:, u_k]\|_1} \\ &= q_{\tilde{h}, U_k, [1]}[t_k]. \end{aligned} \quad (11)$$

Based on the last line of Equation (11), we apply Lemma 3.2 again to build an efficient data structure to sample a row of  $U_k$ . Since  $Y = [1]$  is a rank-1 matrix, we can use point 3 of the lemma and select a larger parameter value  $F = R$  to reduce space usage. The sampling time for this stage becomes  $O(R^2 \log[|I_j|/R])$ .

To summarize, Algorithms 1 and 2 give the construction and sampling procedures for our data structure. They rely on the “BuildSampler” and “RowSample” procedures from Algorithms 3 and 4 in Appendix A.5, which relate to the data structure in Lemma 3.2. In the construction phase, we build  $N$  data structures from Lemma 3.2 for the distribution in Equation (11). Construction costs  $O\left(\sum_{j=1}^N |I_j| R^2\right)$ , and if any matrix  $U_j$  changes, we can rebuild  $Z_j$  in isolation. Because  $F = R$ , the space required for  $Z_j$  is  $O(|I_j| R)$ . In the sampling phase, the procedure in Algorithm 2 accepts an optional index  $j$  of a matrix to exclude from the Khatri-Rao product. The procedure begins by computing the symmetric eigendecomposition of each matrix  $G_{>k}$ . The eigendecomposition is computed only once per binary tree structure, and its computation cost is amortized over all  $J$  samples. It then creates data structures  $E_k$  for each of the distributions specified by Equation (9). These data structures (along with those from the construction phase) are used to draw  $\hat{u}_k$  and  $\hat{t}_k$  in succession. The random variables  $\hat{t}_k$  follow the distribution in Theorem 3.1 conditioned on prior draws, so the multi-index  $(\hat{t}_k)_{k \neq j}$  follows the leverage score distribution on  $A$ , as desired. Appendix A.6 proves the complexity claims in the theorem and provides further details about the algorithms.

### 3.3 Application to Tensor Decomposition

A tensor is a multidimensional array, and the CP decomposition represents a tensor as a sum of outer products [11]. See Appendix A.9 for an overview. To approximately decompose tensor  $\mathcal{T} \in \mathbb{R}^{|I_1| \times \dots \times |I_N|}$ , the popular alternating least squares (ALS) algorithm begins with randomly initialized factor matrices  $U_j$ ,  $U_j \in \mathbb{R}^{|I_j| \times R}$  for  $1 \leq j \leq N$ . We call the column count  $R$  the **rank** of the decomposition. Each round of ALS solves  $N$  overdetermined least squares problems in sequence, each optimizing a single factor matrix while holding the others constant. The  $j$ ’th least squares problem occurs in the update

$$U_j := \arg \min_X \|U_{\neq j} \cdot X^\top - \text{mat}(\mathcal{T}, j)^\top\|_F$$

where  $U_{\neq j}$  is the Khatri-Rao product of all matrices excluding  $U_j$  and  $\text{mat}(\cdot)$  denotes the mode- $j$  matricization of tensor  $\mathcal{T}$ . These problems are ideal candidates for randomized sketching [3, 10, 12], and applying the data structure in Theorem 1.1 gives us the **STS-CP** algorithm.

**Corollary 3.3 (STS-CP).** *Suppose  $\mathcal{T}$  is dense, and suppose we solve each least squares problem in ALS with a randomized sketching algorithm. A leverage score sampling approach as defined in section 2 guarantees that with  $O(R/(\epsilon\delta))$  samples per solve, the residual of each sketched least squares problem is within  $(1 + \epsilon)$  of the optimal residual with probability  $(1 - \delta)$ . The efficient sampler from Theorem 1.1 brings the complexity of ALS to*

$$O\left(\frac{\#it}{\epsilon\delta} \cdot \sum_{j=1}^N (NR^3 \log |I_j| + |I_j| R^2)\right)$$

where “#it” is the number of ALS iterations, and with any term  $\log |I_j|$  replaced by  $\log R$  if  $|I_j| < R$ .

The proof appears in Appendix A.9 and combines Theorem 1.1 with Theorem 2.1. STS-CP also works for sparse tensors and likely provides a greater advantage here than the dense case, as sparse

---

#### Algorithm 1 ConstructKRPSampler( $U_1, \dots, U_N$ )

---

```

1: for  $j = 1..N$  do
2:    $Z_j := \text{BuildSampler}(U_j, F = R, [1])$ 
3:    $G_j := U_j^\top U_j$ 

```

---



---

#### Algorithm 2 KRPSample( $j, J$ )

---

```

1:  $G := \bigotimes_{k \neq j} G_k$ 
2: for  $k \neq j$  do
3:    $G_{>k} := G^+ \otimes \bigotimes_{k=j+1}^N G_k$ 
4:   Decompose  $G_{>k} = V_k \Lambda_k V_k^\top$ 
5:    $E_k := \text{BuildSampler}(\sqrt{\Lambda_k} \cdot V_k^\top, F = 1, G_k)$ 
6: for  $d = 1..J$  do
7:    $h = [1, \dots, 1]^\top$ 
8:   for  $k \neq j$  do
9:      $\hat{u}_k := \text{RowSample}(E_k, h)$ 
10:     $\hat{t}_k := \text{RowSample}(Z_k, h \otimes (V_k[:, \hat{u}_k]))$ 
11:     $h *= U_k[\hat{t}_k, :]$ 
12:    $s_d = (\hat{t}_k)_{k \neq j}$ 
13: return  $s_1, \dots, s_J$ 

```

---

tensors tend to have much larger mode sizes. The complexity for sparse tensors depends heavily on the sparsity structure and is difficult to predict. Nevertheless, we expect a significant speedup based on prior works that use sketching to accelerate CP decomposition [4, 12].

## 4 Experiments

Experiments were conducted on CPU nodes of NERSC Perlmutter, an HPE Cray EX supercomputer, and our code is available at [https://anonymous.4open.science/r/fast\\_tensor\\_leverage-E0EE](https://anonymous.4open.science/r/fast_tensor_leverage-E0EE). On tensor decomposition experiments, we compare our algorithms against the random and hybrid versions of CP-ARLS-LEV proposed by Larsen and Kolda [12]. These algorithms outperform uniform sampling and row-norm-squared sampling, achieving excellent accuracy and runtime relative to exact ALS. In contrast to TNS-CP and the Gaussian tensor network embedding proposed by Ma and Solomonik (see Table 1), CP-ARLS-LEV is one of the few algorithms that can practically decompose sparse tensors with mode sizes in the millions. In the worst case, CP-ARLS-LEV requires  $O(R^{N-1}/(\epsilon\delta))$  samples per solve for an  $N$ -dimensional tensor to achieve solution guarantees like those in Theorem 2.1, compared to  $O(R/(\epsilon\delta))$  samples required by STS-CP. Appendices A.10, A.11, and A.12 provide configuration details and additional results.

### 4.1 Runtime Benchmark

Figure 2 shows the time to construct our sampler and draw 50,000 samples from the Khatri-Rao product of i.i.d. Gaussian initialized factor matrices. We quantify the runtime impacts of varying  $N$ ,  $R$ , and  $I$ . The asymptotic behavior in Theorem 1.1 is reflected in our performance measurements, with the exception of the plot that varies  $R$ . Here, construction becomes disproportionately cheaper than sampling due to cache-efficient BLAS3 calls during construction. Even when the full Khatri-Rao product has  $\approx 3.78 \times 10^{22}$  rows (for  $I = 2^{25}$ ,  $N = 3$ ,  $R = 32$ ), we require only 0.31 seconds on average for sampling (top plot, rightmost points).

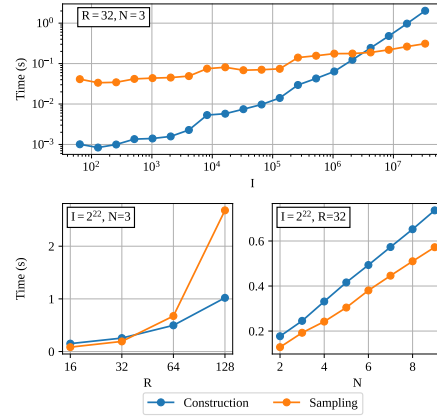

Figure 2: Average time (5 trials) to construct our proposed sampler and draw  $J = 50,000$  samples from  $U_1 \odot \dots \odot U_N$ , with  $U_j \in \mathbb{R}^{I \times R} \forall j$ .

### 4.2 Least Squares Accuracy Comparison

We now test our sampler on least squares problems of the form  $\min_x \|Ax - b\|$ , where  $A = U_1 \odot \dots \odot U_N$  with  $U_j \in \mathbb{R}^{I \times R}$  for all  $j$ . We initialize all matrices  $U_j$  entrywise i.i.d. from a standard normal distribution and randomly multiply 1% of all entries by 10. We choose  $b$  as a Kronecker product  $c_1 \otimes \dots \otimes c_N$ , with each vector  $c_j \in \mathbb{R}^I$  also initialized entrywise from a Gaussian distribution. We assume this form for  $b$  to tractably compute the exact solution to the linear least squares problem and evaluate the accuracy of our randomized methods. We **do not** give our algorithms access to the Kronecker form of  $b$ ; they are only permitted on-demand, black-box access to its entries.

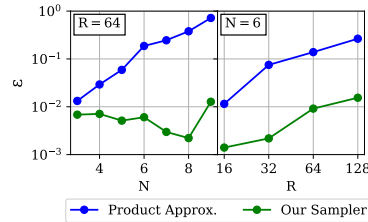

Figure 3: Average error  $\epsilon$  (50 trials) for varying  $R$  and  $N$  on least squares,  $I = 2^{16}$ ,  $J = 5000$ .

Define  $\epsilon = \frac{\text{residual}_{\text{approx}}}{\text{residual}_{\text{opt}}} - 1$ , where  $\text{residual}_{\text{approx}}$  is the residual of a randomized least squares algorithm.  $\epsilon$  is always positive and (similar to its role in Theorem 2.1) quantifies the quality of the randomized algorithm's solution. For varying  $N$  and  $R$ , Figure 3 shows the values  $\epsilon$  achieved by our algorithm against the leverage product approximation used by Larsen and Kolda [12]. Our sampler achieves  $\epsilon \approx 10^{-2}$  even when  $N = 9$ , while the product approximation increases its error by nearly two orders of magnitude.



### 4.3 Sparse Tensor Decomposition

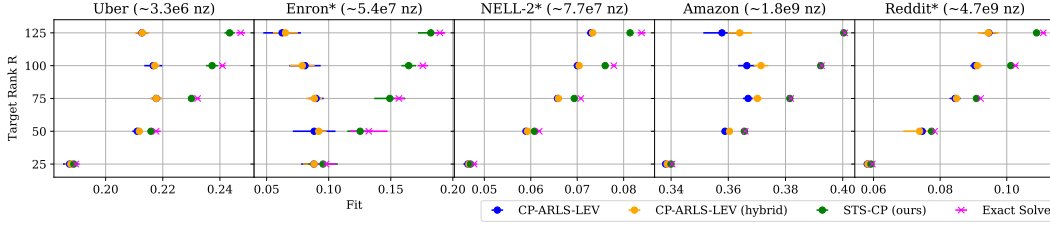

Figure 4: Average fits (8 trials) achieved by randomized ( $J = 2^{16}$ ) and exact ALS for sparse tensor CP decomposition. Error bars indicate 3 standard deviations. See Appendix A.11 for details.

We next apply STS-CP to decompose several large sparse tensors from the FROSTT collection [23] (see Appendix A.11 for more details on the experimental configuration). Our accuracy metric is the tensor fit. Letting  $\tilde{\mathcal{T}}$  be our low-rank CP approximation, the fit with respect to ground-truth tensor  $\mathcal{T}$  is  $\text{fit}(\tilde{\mathcal{T}}, \mathcal{T}) = 1 - \|\tilde{\mathcal{T}} - \mathcal{T}\|_F / \|\mathcal{T}\|_F$ .

As Figure 4 shows, the fit achieved by CP-ARLS-LEV compared to STS-CP degrades as the rank increases for fixed sample count. By contrast, STS-CP improves the fit consistently, with a significant improvement at rank 125 over CP-ARLS-LEV. Timings for both algorithms are available in Appendix A.12.4. Figure 5 explains the higher fit achieved by our sampler on the Uber and Amazon tensors. In the first 10 rounds of ALS, we compute the exact solution to each least squares problem before updating the factor matrix with a randomized algorithm’s solution. Figure 5 plots  $\varepsilon$  as ALS progresses for hybrid CP-ARLS-LEV and STS-CP. The latter achieves lower residual per solve. We further note that CP-ARLS-LEV exhibits an oscillating error pattern based on the tensor mode isolated in each ALS update.

To assess the tradeoff between sampling time and accuracy, we compare the fit as a function of ALS update time for STS-CP and random CP-ARLS-LEV in Figure 6 (time to compute the fit excluded). On the Reddit tensor with  $R = 100$ , we compared CP-ARLS-LEV with  $J = 2^{16}$  against CP-ARLS-LEV with progressively larger sample count. Even with  $2^{18}$  samples per randomized least squares solve, CP-ARLS-LEV cannot achieve the maximum fit of STS-CP. Furthermore, STS-CP makes progress more quickly than CP-ARLS-LEV. See Appendix A.12.3 for similar plots for other datasets.

## 5 Discussion and Future Work

Our method for exact Khatri-Rao leverage score sampling enjoys strong theoretical guarantees and practical performance benefits. Especially for massive tensors such as Amazon and Reddit, our randomized algorithm’s guarantees translate to faster progress to solution and higher final accuracies. The segment tree approach described here can be applied to sample from tensor networks besides the Khatri-Rao product. In particular, modifications to Lemma 3.2 permit efficient leverage sampling from a contraction of 3D tensor cores in ALS tensor train decomposition. We leave the generalization of our fast sampling technique as future work.

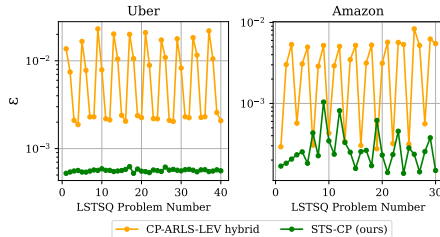

Figure 5: Average  $\varepsilon$  (5 runs) for randomized least squares solves in 10 ALS rounds,  $R = 50$ .

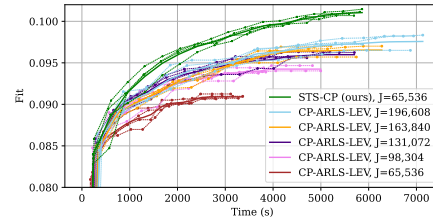

Figure 6: Fit vs. time, Reddit tensor,  $R = 100$ . Thick lines are averages 4 trial interpolations.

## References

- [1] Thomas D. Ahle, Michael Kapralov, Jakob B. T. Knudsen, Rasmus Pagh, Ameya Velingker, David P. Woodruff, and Amir Zandieh. *Oblivious Sketching of High-Degree Polynomial Kernels*, pages 141–160. 2020. doi: 10.1137/1.9781611975994.9.
- [2] Nir Ailon and Bernard Chazelle. The fast Johnson–Lindenstrauss transform and approximate nearest neighbors. *SIAM Journal on computing*, 39(1):302–322, 2009.
- [3] Casey Battaglini, Grey Ballard, and Tamara G. Kolda. A practical randomized CP tensor decomposition. *SIAM Journal on Matrix Analysis and Applications*, 39(2):876–901, 2018. doi: 10.1137/17M1112303.
- [4] Dehua Cheng, Richard Peng, Yan Liu, and Ioakeim Perros. SPALS: Fast alternating least squares via implicit leverage scores sampling. In *Advances in Neural Information Processing Systems*, volume 29. Curran Associates, Inc., 2016.
- [5] Huaian Diao, Rajesh Jayaram, Zhao Song, Wen Sun, and David Woodruff. Optimal sketching for Kronecker product regression and low rank approximation. In H. Wallach, H. Larochelle, A. Beygelzimer, F. d'Alché-Buc, E. Fox, and R. Garnett, editors, *Advances in Neural Information Processing Systems*, volume 32. Curran Associates, Inc., 2019.
- [6] Petros Drineas, Malik Magdon-Ismael, Michael W. Mahoney, and David P. Woodruff. Fast approximation of matrix coherence and statistical leverage. *J. Mach. Learn. Res.*, 13(1): 3475–3506, dec 2012. ISSN 1532-4435.
- [7] Matthew Fahrbach, Gang Fu, and Mehrdad Ghadiri. Subquadratic Kronecker regression with applications to tensor decomposition. In S. Koyejo, S. Mohamed, A. Agarwal, D. Belgrave, K. Cho, and A. Oh, editors, *Advances in Neural Information Processing Systems*, volume 35, pages 28776–28789. Curran Associates, Inc., 2022.
- [8] Azzam Haidar, Tingxing Dong, Stanimire Tomov, Piotr Luszczek, and Jack Dongarra. Framework for batched and GPU-resident factorization algorithms to block Householder transformations. In *ISC High Performance*, Frankfurt, Germany, 07-2015 2015. Springer, Springer.
- [9] N. Halko, P. G. Martinsson, and J. A. Tropp. Finding structure with randomness: Probabilistic algorithms for constructing approximate matrix decompositions. *SIAM Review*, 53(2):217–288, 2011. doi: 10.1137/090771806.
- [10] Ruhui Jin, Tamara G Kolda, and Rachel Ward. Faster Johnson–Lindenstrauss transforms via Kronecker products. *Information and Inference: A Journal of the IMA*, 10(4):1533–1562, October 2020. ISSN 2049-8772. doi: 10.1093/imaia/iaaa028.
- [11] Tamara G. Kolda and Brett W. Bader. Tensor decompositions and applications. *SIAM Review*, 51(3):455–500, August 2009. ISSN 0036-1445. doi: 10.1137/07070111X. Publisher: Society for Industrial and Applied Mathematics.
- [12] Brett W. Larsen and Tamara G. Kolda. Practical leverage-based sampling for low-rank tensor decomposition. *SIAM J. Matrix Analysis and Applications*, 43(3):1488–1517, August 2022. doi: 10.1137/21M1441754.
- [13] Shuangzhe Liu and Götz Trenkler. Hadamard, Khatri-Rao, Kronecker and other matrix products. *International Journal of Information and Systems Sciences*, 4(1):160–177, 2008.
- [14] Linjian Ma and Edgar Solomonik. Cost-efficient Gaussian tensor network embeddings for tensor-structured inputs. *CoRR*, abs/2205.13163, 2022. doi: 10.48550/arXiv.2205.13163.
- [15] Osman Asif Malik. More efficient sampling for tensor decomposition with worst-case guarantees. In Kamalika Chaudhuri, Stefanie Jegelka, Le Song, Csaba Szepesvari, Gang Niu, and Sivan Sabato, editors, *Proceedings of the 39th International Conference on Machine Learning*, volume 162 of *Proceedings of Machine Learning Research*, pages 14887–14917. PMLR, 17–23 Jul 2022.

- 408 [16] Osman Asif Malik, Vivek Bharadwaj, and Riley Murray. Sampling-based decomposition  
409 algorithms for arbitrary tensor networks, October 2022. arXiv:2210.03828 [cs, math].
- 410 [17] James Martens and Roger Grosse. Optimizing neural networks with Kronecker-factored  
411 approximate curvature. In *Proceedings of the 32nd International Conference on International*  
412 *Conference on Machine Learning - Volume 37*, ICML'15, pages 2408–2417, Lille, France, July  
413 2015. JMLR.org.
- 414 [18] Baorun Mu, Saeed Soori, Bugra Can, Mert Gürbüzbalaban, and Maryam Mehri Dehnavi.  
415 HyLo: A hybrid low-rank natural gradient descent method. In *Proceedings of the International*  
416 *Conference on High Performance Computing, Networking, Storage and Analysis*, SC '22. IEEE  
417 Press, 2022. ISBN 9784665454445.
- 418 [19] Aravind Reddy, Zhao Song, and Lichen Zhang. Dynamic tensor product regression. In  
419 S. Koyejo, S. Mohamed, A. Agarwal, D. Belgrave, K. Cho, and A. Oh, editors, *Advances in*  
420 *Neural Information Processing Systems*, volume 35, pages 4791–4804. Curran Associates, Inc.,  
421 2022.
- 422 [20] Feras A. Saad, Cameron E. Freer, Martin C. Rinard, and Vikash K. Mansinghka. Optimal  
423 approximate sampling from discrete probability distributions. *Proceedings of the ACM on*  
424 *Programming Languages*, 4(POPL):1–31, January 2020. ISSN 2475-1421. doi: 10.1145/  
425 3371104.
- 426 [21] N.D. Sidiropoulos and R.S. Budampati. Khatri-Rao space-time codes. *IEEE Transactions on*  
427 *Signal Processing*, 50(10):2396–2407, 2002. doi: 10.1109/TSP.2002.803341.
- 428 [22] Shaden Smith and George Karypis. SPLATT: The Surprisingly Parallel spArse Tensor Toolkit.  
429 <http://cs.umn.edu/~splatt/>, 2016.
- 430 [23] Shaden Smith, Jee W. Choi, Jiajia Li, Richard Vuduc, Jongsoo Park, Xing Liu, and George  
431 Karypis. FROSTT: The formidable repository of open sparse tensors and tools, 2017. URL  
432 <http://frostdt.io/>.
- 433 [24] Linghao Song, Yuze Chi, Atefeh Sohrabizadeh, Young-kyu Choi, Jason Lau, and Jason Cong.  
434 Sextans: A streaming accelerator for general-purpose sparse-matrix dense-matrix multiplication.  
435 In *Proceedings of the 2022 ACM/SIGDA International Symposium on Field-Programmable*  
436 *Gate Arrays*, FPGA '22, page 65–77, New York, NY, USA, 2022. Association for Computing  
437 Machinery. ISBN 9781450391498. doi: 10.1145/3490422.3502357.
- 438 [25] Yining Wang, Hsiao-Yu Tung, Alexander J Smola, and Anima Anandkumar. Fast and guaranteed  
439 tensor decomposition via sketching. *Advances in neural information processing systems*, 28,  
440 2015.
- 441 [26] Sasindu Wijeratne, Ta-Yang Wang, Rajgopal Kannan, and Viktor Prasanna. Accelerating  
442 sparse MTTKRP for tensor decomposition on FPGA. In *Proceedings of the 2023 ACM/SIGDA*  
443 *International Symposium on Field Programmable Gate Arrays*, FPGA '23, page 259–269, New  
444 York, NY, USA, 2023. Association for Computing Machinery. ISBN 9781450394178. doi:  
445 10.1145/3543622.3573179.
- 446 [27] David Woodruff and Amir Zandieh. Leverage score sampling for tensor product matrices in  
447 input sparsity time. In Kamalika Chaudhuri, Stefanie Jegelka, Le Song, Csaba Szepesvari, Gang  
448 Niu, and Sivan Sabato, editors, *Proceedings of the 39th International Conference on Machine*  
449 *Learning*, volume 162 of *Proceedings of Machine Learning Research*, pages 23933–23964.  
450 PMLR, 17–23 Jul 2022.
- 451 [28] David P Woodruff et al. Sketching as a tool for numerical linear algebra. *Foundations and*  
452 *Trends® in Theoretical Computer Science*, 10(1–2):1–157, 2014.
- 453 [29] Yao Yu, Athina P. Petropulu, and H. Vincent Poor. MIMO radar using compressive sampling.  
454 *IEEE Journal of Selected Topics in Signal Processing*, 4(1):146–163, February 2010. doi:  
455 10.1109/JSTSP.2009.2038973.

## A Appendix

### A.1 Details about Table 1

CP-ALS [11] is the standard, non-randomized alternating least squares method given by Algorithm 6 in Appendix A.9. The least squares problems in the algorithm are solved by exact methods. CP-ARLS-LEV is the algorithm proposed by Larsen and Kolda [12] that samples rows from the Khatri-Rao product according to a product distribution of leverage scores on each factor matrix. The per-iteration runtimes for both algorithms are re-derived in Appendix C.3 of the work by Malik [15] from their original sources. Malik [15] proposed the CP-ALS-ES algorithm (not listed in the table), which is superseded by the TNS-CP algorithm [16]. We report the complexity from Table 1 of the latter work. The algorithm by Ma and Solomonik [14] is based on a general method to sketch tensor networks. Our reported complexity is listed in Table 1 for Algorithm 1 in their work.

Table 1 does not list the one-time initialization costs for any of the methods. All methods require at least  $O(NIR)$  time to randomly initialize factor matrices, and CP-ALS requires no further setup. CP-ARLS-LEV, TNS-CP, and STS-CP all require  $O(NIR^2)$  initialization time. CP-ARLS-LEV uses the initialization phase to compute the initial leverage scores of all factor matrices. TNS-CP uses the initialization step to compute and cache Gram matrices of all factors  $U_j$ . STS-CP must build the efficient sampling data structure described in Theorem 1.1. The algorithm from Ma and Solomonik requires an initialization cost of  $O(I^N m)$ , where  $m$  is a sketch size parameter that is  $O(NR/\varepsilon^2)$  to achieve the  $(\varepsilon, \delta)$  accuracy guarantee for each least squares solve.

### A.2 Definitions of Matrix Products

Table 2 defines the standard matrix product  $\cdot$ , Hadamard product  $\otimes$ , Kronecker product  $\otimes$ , and Khatri-Rao product  $\odot$ , as well as the dimensions of their operands.

Table 2: Matrix product definitions.

| OPERATION         | SIZE OF $A$  | SIZE OF $B$  | SIZE OF $C$          | DEFINITION                                            |
|-------------------|--------------|--------------|----------------------|-------------------------------------------------------|
| $C = A \cdot B$   | $(m, k)$     | $(k, n)$     | $(m, n)$             | $C[i, j] = \sum_{a=1}^k A[i, a] B[a, j]$              |
| $C = A \otimes B$ | $(m, n)$     | $(m, n)$     | $(m, n)$             | $C[i, j] = A[i, j] B[i, j]$                           |
| $C = A \otimes B$ | $(m_1, n_1)$ | $(m_2, n_2)$ | $(m_1 m_2, n_1 n_2)$ | $C[(i_1, i_2), (j_1, j_2)] = A[i_1, j_1] B[i_2, j_2]$ |
| $C = A \odot B$   | $(m_1, n)$   | $(m_2, n)$   | $(m_1 m_2, n)$       | $C[(i_1, i_2), j] = A[i_1, j] B[i_2, j]$              |

### A.3 Further Comparison to Prior Work

In this section, we provide a more detailed comparison of our sampling algorithm with the one proposed by Woodruff and Zandieh [27]. Their work introduces a ridge leverage-score sampling algorithm for Khatri-Rao products with the attractive property that the sketch can be formed in input-sparsity time. For constant failure probability  $\delta$ , the runtime to produce a  $(1 \pm \epsilon)$   $\ell_2$ -subspace embedding for  $A = U_1 \odot \dots \odot U_N$  is given in Appendix B of their work (proof of Theorem 2.7). Adapted to our notation, **their runtime** is

$$O\left(\log^4 R \log N \sum_{i=1}^N \text{nnz}(U_i) + \frac{N^7 s_\lambda^2 R}{\varepsilon^4} \log^5 R \log N\right)$$

where  $s_\lambda = \sum_{i=1}^R \frac{\lambda_i}{\lambda_i + \lambda}$ ,  $\lambda_1, \dots, \lambda_R$  are the eigenvalues of the Gram matrix  $G$  of matrix  $A$ , and  $\lambda \geq 0$  is a regularization parameter. For comparison, **our runtime** for constant failure probability is

$$O\left(R \sum_{i=1}^N \text{nnz}(U_i) + \frac{R^3}{\varepsilon} \log\left(\prod_{i=1}^N |I_i|\right)\right).$$

Woodruff and Zandieh’s method provides a significant advantage for large column count  $R$  or high regularization parameter  $\lambda$ . As a result, it is well-suited to the problem of regularized low-rank approximation when the column count  $R$  is given by the number of data points in a dataset. On the other hand, the algorithm has poor dependence on the matrix count  $N$  and error parameter  $\varepsilon$ . For

491 tensor decomposition,  $R$  is typically no larger than a few hundred, while high accuracy ( $\epsilon \approx 10^{-3}$ ) is  
 492 required for certain tensors to achieve a fit competitive with non-randomized methods (see section  
 493 4.3, Figures 4 and 5). When  $\lambda$  is small, we have  $s_\lambda \approx R$ . Here, Woodruff and Zandieh’s runtime has  
 494 an  $O(R^3)$  dependence similar to ours. When  $R \leq \log^4 R \log N$ , our sampler has faster construction  
 495 time as well.

496 Finally, we note that our sampling data structure can be constructed using highly cache-efficient,  
 497 parallelizable symmetric rank- $R$  updates (BLAS3 operation dSYRK). As a result, the quadratic  
 498 dependence on  $R$  in our algorithm can be mitigated by dense linear algebra accelerators, such as  
 499 GPUs or TPUs.

#### 500 A.4 Proof of Theorem 3.1

501 Theorem 3.1 appeared in a modified form as Lemma 10 in the work by Malik [15]. This original  
 502 version used the definition  $\tilde{G}_{>k} = \Phi \circledast \left( \bigstar_{a=k+1}^N G_k \right)$  in place of  $G_{>k}$  defined in Equation (4), where  
 503  $\Phi$  was a sketched approximation of  $G^+$ . Woodruff and Zandieh [27] exhibit a version of the theorem  
 504 with similar modifications. We prove the version stated in our work below.

505 *Proof of Theorem 3.1.* We rely on the assumption that the Khatri-Rao product  $A$  is a nonzero matrix  
 506 (but it may be rank-deficient). We begin by simplifying the expression for the leverage score of a row  
 507 of  $A$  corresponding to multi-index  $(i_1, \dots, i_N)$ . Beginning with Equation (2), we derive

$$\begin{aligned}
 \ell_{i_1, \dots, i_N} &= A[(i_1, \dots, i_N), :] G^+ A[(i_1, \dots, i_N), :]^\top \\
 &= \langle A[(i_1, \dots, i_N), :]^\top A[(i_1, \dots, i_N), :], G^+ \rangle \\
 &= \left\langle \left( \bigstar_{a=1}^N U_a[i_a, :] \right)^\top \left( \bigstar_{a=1}^N U_a[i_a, :] \right), G^+ \right\rangle \\
 &= \left\langle \bigstar_{a=1}^N U_a[i_a, :]^\top U_a[i_a, :], G^+ \right\rangle \\
 &= \left\langle \bigstar_{a=1}^{k-1} U_a[i_a, :]^\top U_a[i_a, :], U_k[i_k, :]^\top U_k[i_k, :] \circledast \bigstar_{a=k+1}^N U_a[i_a, :]^\top U_a[i_a, :], G^+ \right\rangle \\
 &= \left\langle \bigstar_{a=1}^{k-1} U_a[i_a, :]^\top U_a[i_a, :], U_k[i_k, :]^\top U_k[i_k, :], G^+ \circledast \bigstar_{a=k+1}^N U_a[i_a, :]^\top U_a[i_a, :] \right\rangle.
 \end{aligned} \tag{12}$$

508 We proceed to the main proof of the theorem. To compute  $p(\hat{s}_k = s_k \mid \hat{s}_{<k} = s_{<k})$ , we marginalize  
 509 over random variables  $\hat{s}_{k+1} \dots \hat{s}_N$ . Recalling the definition of  $h_{<k}$  from Equation (3), we have

$$\begin{aligned}
 p(\hat{s}_k = s_k \mid \hat{s}_{<k} = s_{<k}) &\propto \sum_{i_{k+1}, \dots, i_N} p \left( (\hat{s}_{<k} = s_{<k}) \wedge (\hat{s}_k = s_k) \wedge \bigwedge_{u=k+1}^N (\hat{s}_u = i_u) \right) \\
 &\propto \sum_{i_{k+1}, \dots, i_N} \ell_{s_1, \dots, s_k, i_{k+1}, \dots, i_N}.
 \end{aligned} \tag{13}$$

510 The first line above follows by marginalizing over  $\hat{s}_{k+1}, \dots, \hat{s}_N$ . The second line follows because the  
 511 joint random variable  $(\hat{s}_1, \dots, \hat{s}_N)$  follows the distribution of statistical leverage scores on the rows of

512 A. We now plug in Equation (12) to get

$$\begin{aligned}
& \sum_{i_{k+1}, \dots, i_N} \ell_{s_1, \dots, s_k, i_{k+1}, \dots, i_N} \\
&= \sum_{i_{k+1}, \dots, i_N} \langle \bigotimes_{a=1}^{k-1} U_a[s_a, :]^\top U_a[s_a, :], U_k[s_k, :]^\top U_k[s_k, :], G^+ \otimes \bigotimes_{a=k+1}^N U_a[i_a, :]^\top U_a[i_a, :] \rangle \\
&= \sum_{i_{k+1}, \dots, i_N} \langle h_{<k} h_{<k}^\top, U_k[s_k, :]^\top U_k[s_k, :], G^+ \otimes \bigotimes_{a=k+1}^N U_a[i_a, :]^\top U_a[i_a, :] \rangle \\
&= \langle h_{<k} h_{<k}^\top, U_k[s_k, :]^\top U_k[s_k, :], G^+ \otimes \bigotimes_{a=k+1}^N \sum_{i_a=1}^{|I_a|} U_a[i_a, :]^\top U_a[i_a, :] \rangle \\
&= \langle h_{<k} h_{<k}^\top, U_k[s_k, :]^\top U_k[s_k, :], G^+ \otimes \bigotimes_{a=k+1}^N G_a \rangle \\
&= \langle h_{<k} h_{<k}^\top, U_k[s_k, :]^\top U_k[s_k, :], G_{>k} \rangle.
\end{aligned} \tag{14}$$

513 We now compute the normalization constant  $C$  for the distribution by summing the last line of  
514 Equation (14) over all possible values for  $\hat{s}_k$ :

$$\begin{aligned}
C &= \sum_{s_k=1}^{|I_k|} \langle h_{<k} h_{<k}^\top, U_k[s_k, :]^\top U_k[s_k, :], G_{>k} \rangle \\
&= \langle h_{<k} h_{<k}^\top, \sum_{s_k=1}^{|I_k|} U_k[s_k, :]^\top U_k[s_k, :], G_{>k} \rangle \\
&= \langle h_{<k} h_{<k}^\top, G_k, G_{>k} \rangle.
\end{aligned} \tag{15}$$

515 For  $k = 1$ , we have  $h_{<k} = [1, \dots, 1]^\top$ , so  $C = \langle G_k, G_{>k} \rangle$ . Then  $C$  is the sum of all leverage  
516 scores, which is known to be the rank of  $A$  [28]. Since  $A$  was assumed nonzero,  $C \neq 0$ . For  $k > 1$ ,  
517 assume that the conditioning event  $\hat{s}_{<k} = s_{<k}$  occurs with nonzero probability. This is a reasonable  
518 assumption, since our sampling algorithm will never select prior values  $\hat{s}_1, \dots, \hat{s}_{k-1}$  that have 0  
519 probability of occurrence. Let  $\tilde{C}$  be the normalization constant for the conditional distribution on  
520  $\hat{s}_{k-1}$ . Then we have

$$\begin{aligned}
0 &< p(\hat{s}_{k-1} = s_{k-1} \mid \hat{s}_{<k-1} = s_{<k-1}) \\
&= \tilde{C}^{-1} \langle h_{<k-1} h_{<k-1}^\top, U_{k-1}[s_{k-1}, :]^\top U_{k-1}[s_{k-1}, :], G_{>k-1} \rangle \\
&= \tilde{C}^{-1} \langle h_{<k} h_{<k}^\top, G_{>k-1} \rangle \\
&= \tilde{C}^{-1} \langle h_{<k} h_{<k}^\top, G_k \otimes G_{>k} \rangle \\
&= \tilde{C}^{-1} \langle h_{<k} h_{<k}^\top, G_k, G_{>k} \rangle \\
&= \tilde{C}^{-1} C
\end{aligned} \tag{16}$$

521 Since  $\tilde{C} > 0$ , we must have  $C > 0$ . □

## 522 A.5 Proof of Lemma 3.2

523 We detail the construction procedure, sampling procedure, and correctness of our proposed data  
524 structure. Recall that  $T_{I,F}$  denotes the collection of nodes in a full, complete binary tree with  $\lceil I/F \rceil$   
525 leaves. Each leaf  $v \in T_{I,F}$  holds a segment  $S(v) = \{S_0(v) \dots S_1(v)\} \subseteq \{1..I\}$ , with  $|S(v)| \leq F$  and  
526  $S(u) \cap S(v) = \emptyset$  for distinct leaves  $u, v$ . For each internal node  $v$ ,  $S(v) = S(L(v)) \cup S(R(v))$ , where  
527  $L(v)$  and  $R(v)$  denote the left and right children of node  $v$ . The root node  $r$  satisfies  $S(r) = \{1..I\}$ .

528 **Construction:** Algorithm 3 gives the procedure to build the data structure. We initialize a segment  
529 tree  $T_{I,F}$  and compute  $G^v$  for all leaf nodes  $v \in T_{I,F}$  as a sum of outer products of rows from  $U$

(lines 1-3). Starting at the level above the leaves, we then compute  $G^v$  for each internal node as the sum of  $G^{L(v)}$  and  $G^{R(v)}$ , the partial Gram matrices of its two children. Runtime  $O(IR^2)$  is required to compute  $I$  outer products across all iterations of the loop on line 3. Our segment tree has  $\lceil I/F \rceil - 1$  internal nodes, and the addition in line 6 contributes runtime  $O(R^2)$  for each internal node. This adds complexity  $O(R^2(\lceil I/F \rceil - 1)) \leq O(IR^2)$ , for total construction time  $O(IR^2)$ .

To analyze the space complexity, observe that we store a matrix  $G^v \in \mathbb{R}^{R \times R}$  at all  $2\lceil I/F \rceil - 1$  nodes of the segment tree, for asymptotic space usage  $O(\lceil I/F \rceil R^2)$ . We can cut the space usage in half by only storing  $G^v$  when  $v$  is either the root or a left child in our tree, since the sampling procedure in Algorithm 4 only accesses the partial Gram matrix stored by left children. We can cut the space usage in half again by only storing the upper triangle of each symmetric matrix  $G^v$ . Finally, in the special case that  $I < F$ , the segment tree has depth 1 and the initial binary search can be eliminated entirely. As a result, the data structure has  $O(1)$  space overhead, since we can avoid storing any partial Gram matrices  $G^v$ . This proves the complexity claims in point 1 of Lemma 3.2.

---

**Algorithm 3** BuildSampler( $U \in \mathbb{R}^{I \times R}$ ,  $F$ ,  $Y$ )

---

```

1: Build tree  $T_{I,F}$  with depth  $d = \lceil \log \lceil I/F \rceil \rceil$ 
2: for  $v \in \text{leaves}(T_{I,F})$  do
3:    $G^v := \sum_{i \in S(v)} U[i, :]^\top U[i, :]$ 
4: for  $u = d - 2 \dots 0$  do
5:   for  $v \in \text{level}(T_{I,F}, u)$  do
6:      $G^v := G^{L(v)} + G^{R(v)}$ 

```

---

**Sampling:** Algorithm 4 gives the procedure to draw a sample from our proposed data structure. It is easy to verify that the normalization constant  $C$  for  $q_{h,U,Y}$  is  $\langle hh^\top, G^{\text{root}(T_{I,F})}, Y \rangle$ , since  $G^{\text{root}(T_{I,F})} = U^\top U$ . Lines 8 and 9 initialize a pair of templated procedures  $\tilde{m}$  and  $\tilde{q}$ , each of which accepts a node from the segment tree. The former is used to compute the branching threshold at each internal node, and the latter returns the probability vector  $q_{h,U,Y}[S_0(v) : S_1(v)]$  for the segment  $\{S_0(v) \dots S_1(v)\}$  maintained by a leaf node. To see this last fact, observe for  $i \in \{0, \dots, I\}$  that

$$\begin{aligned}
\tilde{q}(v)[i - S_0(v)] &= C^{-1} U[i, :] \cdot (hh^\top \otimes Y) \cdot U[i, :]^\top \\
&= C^{-1} \langle hh^\top, U[i, :]^\top U[i, :], Y \rangle \\
&= q_{h,U,Y}[i].
\end{aligned} \tag{17}$$

The loop on line 12 performs the binary search using the two templated procedures. Line 18 uses the procedure  $\tilde{q}$  to scan through at most  $F$  bin endpoints after the binary search finishes early.

The depth of segment tree  $T_{I,F}$  is  $\log \lceil I/F \rceil$ . As a result, the runtime of the sampling procedure is dominated by  $\log \lceil I/F \rceil$  evaluations of  $\tilde{m}$  and a single evaluation of  $\tilde{q}$  during the binary search. Each execution of procedure  $\tilde{m}$  requires time  $O(R^2)$ , relying on the partial Gram matrices  $G^v$  computed during the construction phase. When  $Y$  is a general p.s.d. matrix, the runtime of  $\tilde{q}$  is  $O(FR^2)$ . This complexity is dominated by the matrix multiplication  $W \cdot (hh^\top \otimes Y)$  on line 5. In this case, the runtime of the “RowSampler” procedure to draw one sample is  $O(R^2 \log \lceil I/F \rceil + FR^2)$ , satisfying the complexity claims in point 2 of the lemma.

Now suppose  $Y$  is a rank-1 matrix with  $Y = uu^\top$  for some vector  $u$ . We have  $hh^\top \otimes Y = (h \otimes u)(h \otimes u)^\top$ . This gives

$$\tilde{q}_p(h, C, v) = \text{diag}(W \cdot (hh^\top \otimes uu^\top) \cdot W) = (W \cdot (h \otimes u))^2$$

where the square is elementwise. The runtime of the procedure  $\tilde{q}$  is now dominated by a matrix-vector multiplication that costs time  $O(FR)$ . In this case, we have per-sample complexity  $O(R^2 \log \lceil I/F \rceil + FR)$ , matching the complexity claim in point 3 of the lemma.

**Correctness:** Recall that the inversion sampling procedure partitions the interval  $[0, 1]$  into  $I$  bins, the  $i$ ’th bin having width  $q_{h,U,Y}[i]$ . The goal of our procedure is to find the bin that contains the uniform random draw  $d$ . Since procedure  $\tilde{m}$  correctly returns the branching threshold (up to the offset “low”) given by equation (7), the loop on line 12 correctly implements a binary search on the list of

---

**Algorithm 4** Row Sampling Procedure
 

---

**Require:** Matrices  $U, Y$  saved from construction, partial Gram matrices  $\{G^v \mid v \in T_{I,F}\}$ .

```

1: procedure  $m_p(h, C, v)$ 
2:   return  $C^{-1} \langle hh^\top, G^v, Y \rangle$ 
3: procedure  $q_p(h, C, v)$ 
4:    $W := U[S(v), :]$ 
5:   return  $C^{-1} \text{diag}(W \cdot (hh^\top \otimes Y) \cdot W^\top)$ 
6: procedure RowSample( $h$ )
7:    $C := \langle hh^\top, G^{\text{root}(T_{I,F})}, Y \rangle$ 
8:    $\tilde{m}(\cdot) := m_p(h, C, \cdot)$ 
9:    $\tilde{q}(\cdot) := q_p(h, C, \cdot)$ 
10:   $c := \text{root}(T_{I,F}), \text{low} = 0.0, \text{high} = 1.0$ 
11:  Sample  $d \sim \text{Uniform}(0.0, 1.0)$ 
12:  while  $c \notin \text{leaves}(T_{I,F})$  do
13:     $\text{cutoff} := \text{low} + \tilde{m}(L(c))$ 
14:    if  $\text{cutoff} \geq d$  then
15:       $c := L(c), \text{high} := \text{cutoff}$ 
16:    else
17:       $c := R(c), \text{low} := \text{cutoff}$ 
18:  return  $S_0(v) + \arg \min_{i \geq 0} \left( \text{low} + \sum_{j=1}^i \tilde{q}(c)[j] < d \right)$ 

```

---

bin endpoints specified by the vector  $q_{h,U,Y}$ . At the end of the loop,  $c$  is a leaf node that maintains a collection  $S(c)$  of bins, one of which contains the random draw  $d$ . Since the procedure  $\tilde{q}$  correctly returns probabilities  $q_{h,U,Y}[i]$  for  $i \in S(c)$  for leaf node  $c$ , (see equation (17)), line 18 finds the bin that contains the random draw  $d$ . The correctness of the procedure follows from the correctness of inversion sampling [20].  $\square$

## 572 A.6 Cohesive Proof of Theorem 1.1

573 In this proof, we fully explain Algorithms 1 and 2 in the context of the sampling procedure outlined  
 574 in section 3.2. We verify the complexity claims first and then prove correctness.

575 **Construction and Update:** For each matrix  $U_j$ , Algorithm 1 builds an efficient row sampling data  
 576 structure  $Z_j$  as specified by Lemma 3.2. We let the p.s.d. matrix  $Y$  that parameterizes each sampler  
 577 be a matrix of ones, and we set  $F = R$ . From Lemma 3.2, the time to construct sampler  $Z_j$  is  
 578  $O(|I_j| R^2)$ . The space used by sampler  $Z_j$  is  $O(\lceil |I_j|/F \rceil R^2) = O(|I_j| R)$ , since  $F = R$ . In case  
 579  $|I_j| < R$ , we use the special case described in Appendix A.5 to get a space overhead  $O(1)$ , avoiding  
 580 a term  $O(R^2)$  in the space complexity.

581 Summing the time and space complexities over all  $j$  proves part 1 of the theorem. To update the data  
 582 structure if matrix  $U_j$  changes, we only need to rebuild sampler  $Z_j$  for a cost of  $O(|I_j| R^2)$ . The  
 583 construction phase also computes and stores the Gram matrix  $G_j$  for each matrix  $U_j$ . We defer the  
 584 update procedure in case a single entry of matrix  $U_j$  changes to Appendix A.7.

585 **Sampling:** For all indices  $k$  (except possibly  $j$ ), lines 1-5 from Algorithm 2 compute  $G_{>k}$  and  
 586 its eigendecomposition. Only a single pass over the Gram matrices  $G_k$  is needed, so these steps  
 587 cost  $O(R^3)$  for each index  $k$ . Line 5 builds an efficient row sampler  $E_k$  for the matrix of scaled  
 588 eigenvectors  $\sqrt{\Lambda_k} \cdot V_k$ . For sampler  $k$ , we set  $Y = G_k$  with cutoff parameter  $F = 1$ . From Lemma  
 589 3.2, the construction cost is  $O(R^3)$  for each index  $k$ , and the space required by each sampler is  
 590  $O(R^3)$ . Summing these quantities over all  $k \neq j$  gives asymptotic runtime  $O(NR^3)$  for lines 2-5.

591 The loop spanning lines 6-12 draws  $J$  row indices from the Khatri-Rao product  $U_{\neq j}$ . For each  
 592 sample, we maintain a “history vector”  $h$  to write the variables  $h_{<k}$  from Equation (3). For each  
 593 index  $k \neq j$ , we draw random variable  $\hat{u}_k$  using the row sampler  $E_k$ . This random draw indexes a  
 594 scaled eigenvector of  $G_{>k}$ . We then use the history vector  $h$  multiplied by the eigenvector to sample  
 595 a row index  $\hat{t}_k$  using data structure  $Z_k$ . The history vector  $h$  is updated, and we proceed to draw the  
 596 next index  $\hat{t}_k$ .



As written, lines 2-5 also incur scratch space usage  $O(NR^3)$ . The scratch space can be reduced to  $O(R^3)$  by exchanging the order of loops on line 6 and line 8 and allocating  $J$  separate history vectors  $h$ , once for each draw. Under this reordering, we perform all  $J$  draws for each variable  $\hat{u}_k$  and  $\hat{t}_k$  before moving to  $\hat{u}_{k+1}$  and  $\hat{t}_{k+1}$ . In this case, only a single data structure  $E_k$  is required at each iteration of the outer loop, and we can avoid building all the structures in advance on line 5. We keep the algorithm in the form written for simplicity, but we implemented the memory-saving approach in our code.

From Lemma 3.2, lines 9 and 10 cost  $O(R^2 \log R)$  and  $O(R^2 \log \lceil |I_k| / R \rceil)$ , respectively. Line 11 costs  $O(R)$  and contributes a lower-order term. Summing over all  $k \neq j$ , the runtime to draw a single sample is

$$O \left( \sum_{k \neq j} (R^2 \log \lceil |I_k| / R \rceil + R^2 \log R) \right) = O \left( \sum_{k \neq j} R^2 \log \max(|I_k|, R) \right).$$

Adding the runtime for all  $J$  samples to the runtime of the loop spanning lines 2-6 gives runtime  $O(NR^3 + J \sum_{k \neq j} R^2 \log \max(|I_k|, R))$ , and the complexity claims have been proven.

**Correctness:** We show correctness for the case where  $j = -1$  and we sample from the Khatri-Rao product of all matrices  $U_k$ , since the proof for any other value of  $j$  requires a simple reindexing of matrices. To show that our sampler is correct, it is enough to prove the condition that for  $1 \leq k \leq N$ ,

$$p(\hat{t}_k = t_k \mid h_{<k}) = q_{h_{<k}, U_k, G_{>k}}[t_k], \quad (18)$$

since, by Theorem 3.1,  $p(\hat{s}_k = s_k \mid \hat{s}_{<k} = s_{<k}) = q_{h_{<k}, U_k, G_{>k}}[s_k]$ . This would imply that the joint random variable  $(\hat{t}_1, \dots, \hat{t}_N)$  has the same probability distribution as  $(\hat{s}_1, \dots, \hat{s}_N)$ , which by definition follows the leverage score distribution on  $U_1 \odot \dots \odot U_N$ . To prove the condition in Equation (18), we apply Equations (9) and (11) derived earlier:

$$\begin{aligned} p(\hat{t}_k = t_k \mid h_{<k}) &= \sum_{u_k=1}^R p(\hat{t}_k = t_k \mid \hat{u}_k = u_k, h_{<k}) p(\hat{u}_k = u_k \mid h_{<k}) && \text{(Bayes' Rule)} \\ &= \sum_{u_k=1}^R w[u_k] \frac{W[t_k, u_k]}{\|W[:, u_k]\|_1} && \text{(Equations (9) and (11), in reverse)} \\ &= q_{h_{<k}, U_k, G_{>k}}[t_k]. \end{aligned} \quad (19)$$

□

## A.7 Efficient Single-Element Updates

Applications such as CP decomposition typically change all entries of a single matrix  $U_j$  between iterations, incurring an update cost  $O(|I_j| R^2)$  for our data structure from Theorem 1.1. In case only a single element of  $U_j$  changes, our data structure can be updated in time  $O(R \log |I_j|)$ .

*Proof.* Algorithm 5 gives the procedure when the update  $U_j[r, c] := \hat{u}$  is performed. The matrices  $G^v$  refer to the partial Gram matrices maintained by each node  $v$  of the segment trees in our data structure, and the matrix  $\tilde{U}_j$  refers to the matrix  $U_j$  before the update operation.

Let  $T_{|I_j|, R}$  be the segment tree corresponding to matrix  $U_j$  in the data structure, and let  $v \in T_{|I_j|, R}$  be the leaf whose segment contains  $r$ . Lines 3-5 of the algorithm update the row and column indexed by  $c$  in the partial Gram matrix held by the leaf node.

The only other nodes requiring an update are ancestors of  $v$ , each holding a partial Gram matrix that is the sum of its two children. Starting from the direct parent  $A(v)$ , the loop on line 6 performs these ancestor updates. The addition on line 8 only requires time  $O(R)$ , since only row and column  $c$  change between the old value of  $G^v$  and its updated version. Thus, the runtime of this procedure is  $O(R \log \lceil |I_j| / R \rceil)$  from multiplying the cost to update a single node by the depth of the tree. □

---

**Algorithm 5** UpdateSampler( $j, r, c, \hat{u}$ )

---

```
1: Let  $u = \tilde{U}_j[r, c]$ 
2: Locate  $v$  such that  $r \in S(v)$ 
3: Update  $G^v[c, :] += (\hat{u} - u)\tilde{U}_j[r, :]$ 
4: Update  $G^v[:, c] += (\hat{u} - u)\tilde{U}_j[:, r]^\top$ 
5: Update  $G^v[c, c] += (\hat{u} - u)^2$ 
6: while  $v \neq \text{root}(T_{|I_j|, R})$  do
7:    $v_{\text{prev}} := v, v := A(v)$ 
8:   Update  $G^v := G^{\text{sibling}(v_{\text{prev}})} + G^{v_{\text{prev}}}$ 
```

---

## 632 A.8 Extension to Sparse Input Matrices

633 Our data structure is designed to sample from Khatri-Rao products  $U_1 \odot \dots \odot U_N$  where the input  
634 matrices  $U_1, \dots, U_N$  are dense, a typical situation in tensor decomposition. Slight modifications to  
635 the construction procedure permit our data structure to handle sparse matrices efficiently as well. The  
636 following corollary states the result as a modification to Theorem 1.1.

637 **Corollary A.1** (Sparse Input Modification). *When input matrices  $U_1, \dots, U_N$  are sparse, point 1*  
638 *of Theorem 1.1 can be modified so that the proposed data structure has  $O\left(R \sum_{j=1}^N \text{nnz}(U_j)\right)$*   
639 *construction time and  $O\left(\sum_{j=1}^N \text{nnz}(U_j)\right)$  storage space. The sampling time and scratch space*  
640 *usage in point 2 of Theorem 1.1 does not change. The single-element update time in point 1 is likewise*  
641 *unchanged.*

642 *Proof.* We will modify the data structure in Lemma 3.2. The changes to its construction and storage  
643 costs will propagate to our Khatri-Rao product sampler, which maintains one of these data structures  
644 for each input matrix.

645 Let us restrict ourselves to the case  $F = R, Y = [1]$  in relation to the data structure in Lemma  
646 3.2. These choices for  $F$  and  $Y$  are used in the construction phase given by Algorithm 1. The  
647 proof in Appendix A.5 constrains each leaf  $v$  of a segment tree  $T_{I, F}$  to hold a contiguous segment  
648  $S(v) \subseteq \{1..I\}$  of cardinality at most  $F$ . Instead, choose each segment  $S(v) = \{S_0(v)..S_1(v)\}$   
649 so that  $U[S_0(v) : S_1(v), :]$  has at most  $R^2$  nonzeros, and the leaf count of the tree is at most  
650  $\lceil \text{nnz}(U)/R^2 \rceil + 1$  for input matrix  $U \in \mathbb{R}^{I \times R}$ . Assuming the nonzeros of  $U$  are sorted in row-major  
651 order, we can construct such a partition of  $\{1..I\}$  into segments in time  $O(\text{nnz}(U))$  by iterating in  
652 order through the nonzero rows and adding each of them to a “current” segment. We shift to a new  
653 segment when the current segment cannot hold any more nonzeros.

654 This completes the modification to the data structure in Lemma 3.2, and we now analyze its updated  
655 time / space complexity.

656 **Updated Construction / Update Complexity of Lemma 3.2,  $F = R, Y = [1]$ :** Algorithm 3  
657 constructs the partial Gram matrix for each leaf node  $v$  in the segment tree. Each nonzero in the  
658 segment  $U[S_0(v) : S_1(v), :]$  contributes time  $O(R)$  during line 3 of Algorithm 3 to update a single  
659 row and column of  $G^v$ . Summed over all leaves, the cost of line 3 is  $O(\text{nnz}(U)R)$ . The remainder  
660 of the construction procedure updates the partial Gram matrices of all internal nodes. Since there  
661 are at most  $O(\lceil \text{nnz}(U)/R^2 \rceil)$  internal nodes and the addition on line 6 costs  $O(R^2)$  per node, the  
662 remaining steps of the construction procedure cost  $O(\text{nnz}(U))$ , a lower-order term. The construction  
663 time is therefore  $O(\text{nnz}(U)R)$ .

664 Since we store a single partial Gram matrix of size  $R^2$  at each of  $O(\lceil \text{nnz}(U)/R^2 \rceil)$  internal nodes,  
665 the space complexity of our modified data structure is  $O(\text{nnz}(U))$ .

666 Finally, the data structure update time in case a single element of  $U$  is modified does not change from  
667 Theorem 1.1. Since the depth of the segment tree  $\lceil \text{nnz}(U)/R^2 \rceil + 1$  is upper-bounded by  $\lceil I/R \rceil + 1$ ,  
668 the runtime of the update procedure in Algorithm 5 stays the same.

669 **Updated Sampling Complexity of Lemma 3.2,  $F = R, Y = [1]$ :** The procedure “RowSample”  
670 in Algorithm 4 now conducts a traversal of a tree of depth  $O(\lceil \text{nnz}(U)/R^2 \rceil)$ . As a result, we

can still upper-bound the number of calls to procedure  $\tilde{m}$  as  $\lceil I/F \rceil$ . The runtime of procedure  $\tilde{m}$  is unchanged. The runtime of procedure  $\tilde{q}$  for leaf node  $c$  is dominated by the matrix-vector multiplication  $U[S_0(c) : S_1(c), :] \cdot h$ . This runtime is  $O(\text{nnz}(U[S_0(c) : S_1(c), :])) \leq O(R^2)$ . Putting these facts together, the sampling complexity of the data structure in Lemma 3.2 does not change under our proposed modifications for  $F = R, Y = [1]$ .

**Updated Construction Complexity of Theorem 1.1:** Algorithm 1 now requires  $O\left(R \sum_{j=1}^N \text{nnz}(U_j)\right)$  construction time and  $O\left(\sum_{j=1}^N \text{nnz}(U_j)\right)$  storage space, summing the costs for the updated structure from Lemma 3.2 over all matrices  $U_1, \dots, U_N$ . The sampling complexity of these data structures is unaffected by the modifications, which completes the proof of the corollary.  $\square$

## A.9 Alternating Least Squares CP Decomposition

**CP Decomposition.** CP decomposition represents an  $N$ -dimensional  $\tilde{\mathcal{T}} \in \mathbb{R}^{|I_1| \times \dots \times |I_N|}$  as a weighted sum of generalized outer products. Formally, let  $U_1, \dots, U_N$  with  $U_j \in \mathbb{R}^{|I_j| \times R}$  be factor matrices with each column having unit norm, and let  $\sigma \in \mathbb{R}^R$  be a nonnegative coefficient vector. We call  $R$  the rank of the decomposition. The tensor  $\tilde{\mathcal{T}}$  that the decomposition represents is given elementwise by

$$\tilde{\mathcal{T}}[i_1, \dots, i_N] := \langle \sigma^\top, U_1[i_1, :], \dots, U_N[i_N, :] \rangle = \sum_{r=1}^R \sigma[r] U_1[i_1, r] \cdots U_N[i_N, r],$$

which is a generalized inner product between  $\sigma^\top$  and rows  $U_j[i_j, :]$  for  $1 \leq j \leq N$ . Given an input tensor  $\mathcal{T}$  and a target rank  $R$ , the goal of approximate CP decomposition is to find a rank- $R$  representation  $\tilde{\mathcal{T}}$  that minimizes the Frobenius norm  $\|\mathcal{T} - \tilde{\mathcal{T}}\|_F$ .

**Definition of Matricization.** The matricization  $\text{mat}(\mathcal{T}, j)$  flattens tensor  $\mathcal{T} \in \mathbb{R}^{|I_1| \times \dots \times |I_N|}$  into a matrix and isolates mode  $j$  along the row axis of the output. The output of matricization has dimensions  $|I_j| \times \prod_{k \neq j} |I_k|$ . We take the formal definition below from a survey by Kolda and Bader [11]. The tensor entry  $\mathcal{T}[i_1, \dots, i_N]$  is equal to the matricization entry  $\text{mat}(\mathcal{T}, j)[i_N, u]$ , where

$$u = 1 + \sum_{\substack{k=1 \\ k \neq j}}^N (i_k - 1) \prod_{\substack{m=1 \\ m \neq j}}^{k-1} |I_m|.$$

**Details about Alternating Least Squares.** Let  $U_1, \dots, U_N$  be factor matrices of a low-rank CP decomposition,  $U_k \in \mathbb{R}^{|I_k| \times R}$ . We use  $U_{\neq j}$  to denote  $\bigodot_{k=N, k \neq j}^{k=1} U_k$ . Note the inversion of order here to match indexing in the definition of matricization above. Algorithm 6 gives the non-randomized alternating least squares algorithm CP-ALS that produces a decomposition of target rank  $R$  given input tensor  $\mathcal{T} \in \mathbb{R}^{|I_1| \times \dots \times |I_N|}$  in general format. The random initialization on line 1 of the algorithm can be implemented by drawing each entry of the factor matrices  $U_j$  according to a standard normal distribution, or via a randomized range finder [9]. The vector  $\sigma$  stores the generalized singular values of the decomposition. At iteration  $j$  within a round, ALS holds all factor matrices except  $U_j$  constant and solves a linear-least squares problem on line 6 for a new value for  $U_j$ . In between least squares solves, the algorithm renormalizes the columns of each matrix  $U_j$  to unit norm and stores their original norms in the vector  $\sigma$ . Appendix A.11 contains more details about the randomized range finder and the convergence criteria used to halt iteration.

We obtain a randomized algorithm for sparse tensor CP decomposition by replacing the exact least squares solve on line 6 with a randomized method according to theorem 2.1. Below, we prove corollary 3.3, which derives the complexity of the randomized CP decomposition algorithm.

*Proof of Corollary 3.3.* The design matrix  $U_{\neq j}$  for optimization problem  $j$  within a round of ALS has dimensions  $\prod_{k \neq j} |I_k| \times R$ . The observation matrix  $\text{mat}(\mathcal{T}, j)^\top$  has dimensions  $\prod_{k \neq j} |I_k| \times |I_j|$ . To achieve error threshold  $1 + \varepsilon$  with probability  $1 - \delta$  on each solve, we draw  $J = O(R/(\varepsilon\delta))$  rows from both the design and observation matrices and solve the downsampled problem (Theorem 2.1).

---

**Algorithm 6** CP-ALS( $\mathcal{T}, R$ )

---

```

1: Initialize  $U_j \in \mathbb{R}^{|I_j| \times R}$  randomly for  $1 \leq j \leq N$ .
2: Renormalize  $U_j[:, i] \leftarrow U_j[:, i] / \|U_j[:, i]\|_2$ ,  $1 \leq j \leq N, 1 \leq i \leq R$ .
3: Initialize  $\sigma \in \mathbb{R}^R$  to  $[1]$ .
4: while not converged do
5:   for  $j = 1..N$  do
6:      $U_j := \arg \min_X \|U_{\neq j} \cdot X^\top - \text{mat}(\mathcal{T}, j)^\top\|_F$ 
7:      $\sigma[i] = \|U_j[:, i]\|_2$ ,  $1 \leq i \leq R$ 
8:     Renormalize  $U_j[:, i] \leftarrow U_j[:, i] / \|U_j[:, i]\|_2$ ,  $1 \leq i \leq R$ .
9: return  $[\sigma; U_1, \dots, U_N]$ .

```

---

713 These rows are sampled according to the leverage score distribution on the rows of  $U_{\neq j}$ , for which we  
714 use the data structure in Theorem 1.1. After a one-time initialization cost  $O(\sum_{j=1}^N |I_j| R^2)$  before  
715 the ALS iteration begins, the complexity to draw  $J$  samples (assuming  $|I_j| \geq R$ ) is

$$O\left(NR^3 + J \sum_{k \neq j} R^2 \log |I_k|\right) = O\left(NR^3 + \frac{R}{\varepsilon \delta} \sum_{k \neq j} R^2 \log |I_k|\right).$$

716 The cost to assemble the corresponding subset of the observation matrix is  $O(J |I_j|) =$   
717  $O(R |I_j| / (\varepsilon \delta))$ . The cost to solve the downsampled least squares problem is  $O(JR^2) =$   
718  $O(|I_j| R^2 / (\varepsilon \delta))$ , which dominates the cost of forming the subset of the observation matrix. Fi-  
719 nally, we require additional time  $O(|I_j| R^2)$  to update the sampling data structure (Theorem 1.1 part  
720 1). Adding these terms together and summing over  $1 \leq j \leq N$  gives

$$\begin{aligned} & O\left(\frac{1}{\varepsilon \delta} \cdot \sum_{j=1}^N \left[ |I_j| R^2 + \sum_{k \neq j} R^3 \log |I_k| \right]\right) \\ &= O\left(\frac{1}{\varepsilon \delta} \cdot \sum_{j=1}^N [|I_j| R^2 + (N-1) R^3 \log |I_j|]\right). \end{aligned} \tag{20}$$

721 Rounding  $N-1$  to  $N$  and multiplying by the number of iterations gives the desired complexity.  
722 When  $|I_j| < R$  for any  $j$ , the complexity changes in Theorem 1.1 propagate to the equation  
723 above. The column renormalization on line 8 of the CP-ALS algorithm contributes additional time  
724  $O(\sum_{j=1}^N |I_j| R)$  per round, a lower-order term.

725 □

## 726 A.10 Experimental Platform and Sampler Parallelism

727 We provide two implementations of our sampler. The first is a slow reference implementation written  
728 entirely in Python, which closely mimics our pseudocode and can be used to test correctness. The  
729 second is an efficient implementation written in C++, parallelized in shared memory with OpenMP  
730 and Intel Thread Building Blocks.

731 Each Perlmutter CPU node (our experimental platform) is equipped with two sockets, each containing  
732 an AMD EPYC 7763 processor with 64 cores. All benchmarks were conducted with our efficient  
733 C++ implementation using 128 OpenMP threads. We linked our code against Intel Thread Building  
734 blocks to call a multithreaded sort function when decomposing sparse tensors. We use OpenBLAS  
735 0.3.21 to handle linear algebra with OpenMP parallelism enabled, but our code links against any  
736 linear algebra library implementing the CBLAS and LAPACK interfaces.

737 Our proposed data structure samples from the exact distribution of leverage scores of the Khatri-Rao  
738 product, thereby enjoying better sample efficiency than alternative approaches such as CP-ARLS-LEV  
739 [12]. The cost to draw each sample, however, is  $O(R^2 \log H)$ , where  $H$  is the number of rows in the  
740 Khatri-Rao product. Methods such as row-norm-squared sampling or CP-ARLS-LEV can draw each

sample in time  $O(\log H)$  after appropriate preprocessing. Therefore, efficient parallelization of our sampling procedure is required for competitive performance, and we present two strategies below.

1. **Asynchronous Thread Parallelism:** The KRPSampleDraw procedure in Algorithm 2 can be called by multiple threads concurrently without data races. The simplest parallelization strategy divides the  $J$  samples equally among the threads in a team, each of which makes calls to KRPSampleDraw asynchronously. This strategy works well on a CPU, but is less attractive on a SIMT processor like a GPU where instruction streams cannot diverge without significant performance penalties.
2. **Synchronous Batch Parallelism** As an alternative to the asynchronous strategy, suppose for the moment that all leaves have the same depth in each segment tree. Then for every sample, STSample makes an sequence of calls to  $\tilde{m}$ , each updating the current node by branching left or right in the tree. The length of this sequence is the depth of the tree, and it is followed by a single call to the function  $\tilde{q}$ . Observe that procedure  $\tilde{m}$  in Algorithm 4 can be computed with a matrix-vector multiplication followed by a dot product. The procedure  $\tilde{q}$  of Algorithm 4 requires the same two operations if  $F = 1$  or  $Y = [1]$ . Thus, we can create a batched version of our sampling procedure that makes a fixed length sequence of calls to batched `gemv` and `dot` routines. All processors march in lock-step down the levels of each segment tree, each of them tracking the branching path of a single sample. The MAGMA linear algebra library provides a batched version of `gemv` [8], while a batched dot product can be implemented with an ad hoc kernel. MAGMA also offers a batched version of the symmetric rank- $k$  update routine `syrk`, which is helpful to parallelize row sampler construction (Algorithm 3). When all leaves in the tree are not at the same level, the the bottom level of the tree can be handled with a special sequence of instructions making the required additional calls to  $\tilde{m}$ .

Our CPU code follows the batch synchronous design pattern. To avoid dependency on GPU-based MAGMA routines in our CPU prototype, however, portions of the code that should be batched BLAS calls are standard BLAS calls wrapped in a `for` loop. These sections can be easily replaced when the appropriate batched routines are available.

## A.11 Sparse Tensor CP Experimental Configuration

Table 3: Sparse Tensors from FROSTT collection.

| TENSOR         | DIMENSIONS                                       | NONZEROS      | PREP. | INIT. |
|----------------|--------------------------------------------------|---------------|-------|-------|
| UBER PICKUPS   | $183 \times 24 \times 1,140 \times 1,717$        | 3,309,490     | NONE  | IID   |
| ENRON EMAILS   | $6,066 \times 5,699 \times 244,268 \times 1,176$ | 54,202,099    | LOG   | RRF   |
| NELL-2         | $12,092 \times 9,184 \times 28,818$              | 76,879,419    | LOG   | IID   |
| AMAZON REVIEWS | $4,821,207 \times 1,774,269 \times 1,805,187$    | 1,741,809,018 | NONE  | IID   |
| REDDIT-2015    | $8,211,298 \times 176,962 \times 8,116,559$      | 4,687,474,081 | LOG   | IID   |

Table 3 lists the nonzero counts and dimensions of sparse tensors in our experiments [23]. We took the log of all values in the Enron, NELL-2, and Reddit-2015 tensors. Consistent with established practice, this operation damps the effect of a few high magnitude tensor entries on the fit metric [12].

The factor matrices for the Uber, Amazon, NELL-2, and Reddit experiments were initialized with i.i.d. entries from the standard normal distribution. As suggested by Larsen and Kolda [12], the Enron tensor’s factors were initialized with a randomized range finder [9]. The range finder algorithm initializes each factor matrix  $U_j$  as  $\text{mat}(\mathcal{T}, j)S$ , a sketch applied to the mode- $j$  matricization of  $\mathcal{T}$  with  $S \in \mathbb{R}^{\prod_{k \neq j} |I_k| \times R}$ . Larsen and Kolda chose  $S$  as a sparse sampling matrix to select a random subset of fibers along each mode. We instead used an i.i.d. Gaussian sketching matrix that was not materialized explicitly. Instead, we exploited the sparsity of  $\mathcal{T}$  and noted that at most  $\text{nnz}(\mathcal{T})$  columns of  $\text{mat}(\mathcal{T}, j)$  were nonzero. Thus, we computed at most  $\text{nnz}(\mathcal{T})$  rows of the random sketching matrix  $S$ , which were lazily generated and discarded during the matrix multiplication without incurring excessive memory overhead.

ALS was run for a maximum of 40 rounds on all tensors except for Reddit, which was run for 80 rounds. The exact fit was computed every 5 rounds (defined as 1 epoch), and we used an early

785 stopping condition to terminate runs before the maximum round count. The algorithm was terminated  
786 at epoch  $T$  if the maximum fit in the last 3 epochs did not exceed the maximum fit from epoch 1  
787 through epoch  $T - 3$  by tolerance  $10^{-4}$ .

788 Hybrid CP-ARLS-LEV deterministically includes rows from the Khatri-Rao product whose probabil-  
789 ities exceed a threshold  $\tau$ . The ostensible goal of this procedure is to improve diversity in sample  
790 selection, as CP-ARLS-LEV may suffer from many repeat draws of high probability rows. We  
791 replicated the conditions proposed in the original work by selecting  $\tau = 1/J$  [12].

792 Individual trials of non-randomized (exact) ALS on the Amazon and Reddit tensors required several  
793 hours on a single Perlmutter CPU node. To speed up our experiments, accuracy measurements for  
794 exact ALS in Figure 3 were carried out using multi-node SPLATT, The Surprisingly Parallel spArse  
795 Tensor Toolkit [22], on four Perlmutter CPU nodes. The fits computed by SPLATT agree with those  
796 computed by our own non-randomized ALS implementation. As a result, Figure 3 verifies that our  
797 randomized algorithm STS-CP produces tensor decompositions with accuracy comparable to those  
798 by highly-optimized, state-of-the-art CP decomposition software. We leave a distributed-memory  
799 implementation of our *randomized* algorithms to future work.

## 800 A.12 Supplementary Results

### 801 A.12.1 Probability Distribution Comparison

802 Figure 7 provides confirmation on a small test problem that our sampler works as expected. For the  
803 Khatri-Rao product of three matrices  $A = U_1 \odot U_2 \odot U_3$ , it plots the true distribution of leverage  
804 scores against a normalized histogram of 50,000 draws from the data structure in Theorem 1.1. We  
805 choose  $U_1, U_2, U_3 \in \mathbb{R}^{8 \times 8}$  initialized i.i.d. from a standard normal distribution with 1% of all entries  
806 multiplied by 10. We observe excellent agreement between the histogram and the true distribution.

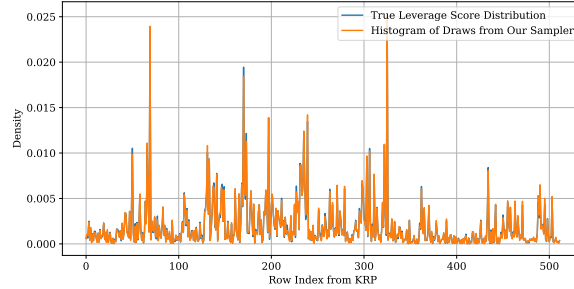

Figure 7: Comparison of true leverage score distribution with histogram of 50,000 samples drawn from  $U_1 \odot U_2 \odot U_3$ .

### 807 A.12.2 Fits Achieved for $J = 2^{16}$

808 Table 4 gives the fits achieved for sparse tensor decomposition for varying rank and algorithm  
809 (presented graphically in Figure 4). Uncertainties are one standard deviation across 8 runs of ALS.

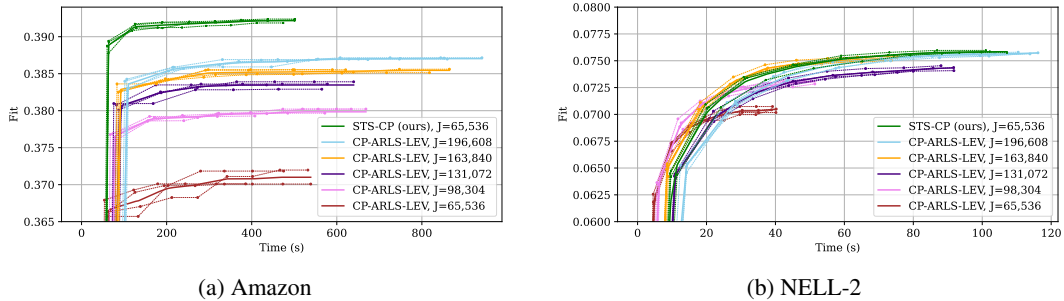

Figure 8: Fit as a function of time,  $R = 100$ .

Table 4: Fits Achieved by Randomized Algorithms for Sparse Tensor Decomposition,  $J = 2^{16}$ , and non-randomized ALS. The best result among randomized algorithms is bolded. “CP-ARLS-LEV-H” refers to the hybrid version of CP-ARLS-LEV and “Exact” refers to non-randomized ALS.

| TENSOR | $R$ | CP-ARLS-LEV          | CP-ARLS-LEV-H        | STS-CP (OURS)               | EXACT                |
|--------|-----|----------------------|----------------------|-----------------------------|----------------------|
| UBER   | 25  | .187 $\pm$ 2.30E-03  | .188 $\pm$ 2.11E-03  | <b>.189</b> $\pm$ 1.52E-03  | .190 $\pm$ 1.41E-03  |
|        | 50  | .211 $\pm$ 1.72E-03  | .212 $\pm$ 1.27E-03  | <b>.216</b> $\pm$ 1.18E-03  | .218 $\pm$ 1.61E-03  |
|        | 75  | .218 $\pm$ 1.76E-03  | .218 $\pm$ 2.05E-03  | <b>.230</b> $\pm$ 9.24E-04  | .232 $\pm$ 9.29E-04  |
|        | 100 | .217 $\pm$ 3.15E-03  | .217 $\pm$ 1.69E-03  | <b>.237</b> $\pm$ 2.12E-03  | .241 $\pm$ 1.00E-03  |
|        | 125 | .213 $\pm$ 1.96E-03  | .213 $\pm$ 2.47E-03  | <b>.243</b> $\pm$ 1.78E-03  | .247 $\pm$ 1.52E-03  |
| ENRON  | 25  | .0881 $\pm$ 1.02E-02 | .0882 $\pm$ 9.01E-03 | <b>.0955</b> $\pm$ 1.19E-02 | .0978 $\pm$ 8.50E-03 |
|        | 50  | .0883 $\pm$ 1.72E-02 | .0920 $\pm$ 6.32E-03 | <b>.125</b> $\pm$ 1.03E-02  | .132 $\pm$ 1.51E-02  |
|        | 75  | .0899 $\pm$ 6.10E-03 | .0885 $\pm$ 6.39E-03 | <b>.149</b> $\pm$ 1.25E-02  | .157 $\pm$ 4.87E-03  |
|        | 100 | .0809 $\pm$ 1.26E-02 | .0787 $\pm$ 1.00E-02 | <b>.164</b> $\pm$ 5.90E-03  | .176 $\pm$ 4.12E-03  |
|        | 125 | .0625 $\pm$ 1.52E-02 | .0652 $\pm$ 1.00E-02 | <b>.182</b> $\pm$ 1.04E-02  | .190 $\pm$ 4.35E-03  |
| NELL-2 | 25  | .0465 $\pm$ 9.52E-04 | .0467 $\pm$ 4.61E-04 | <b>.0470</b> $\pm$ 4.69E-04 | .0478 $\pm$ 7.20E-04 |
|        | 50  | .0590 $\pm$ 5.33E-04 | .0593 $\pm$ 4.34E-04 | <b>.0608</b> $\pm$ 5.44E-04 | .0618 $\pm$ 4.21E-04 |
|        | 75  | .0658 $\pm$ 6.84E-04 | .0660 $\pm$ 3.95E-04 | <b>.0694</b> $\pm$ 2.96E-04 | .0708 $\pm$ 3.11E-04 |
|        | 100 | .0700 $\pm$ 4.91E-04 | .0704 $\pm$ 4.48E-04 | <b>.0760</b> $\pm$ 6.52E-04 | .0779 $\pm$ 5.09E-04 |
|        | 125 | .0729 $\pm$ 8.56E-04 | .0733 $\pm$ 7.22E-04 | <b>.0814</b> $\pm$ 5.03E-04 | .0839 $\pm$ 8.47E-04 |
| AMAZON | 25  | .338 $\pm$ 6.63E-04  | .339 $\pm$ 6.99E-04  | <b>.340</b> $\pm$ 6.61E-04  | .340 $\pm$ 5.78E-04  |
|        | 50  | .359 $\pm$ 1.09E-03  | .360 $\pm$ 8.04E-04  | <b>.366</b> $\pm$ 7.22E-04  | .366 $\pm$ 1.01E-03  |
|        | 75  | .367 $\pm$ 1.82E-03  | .370 $\pm$ 1.74E-03  | <b>.382</b> $\pm$ 9.13E-04  | .382 $\pm$ 5.90E-04  |
|        | 100 | .366 $\pm$ 3.05E-03  | .371 $\pm$ 2.53E-03  | <b>.392</b> $\pm$ 6.67E-04  | .393 $\pm$ 5.62E-04  |
|        | 125 | .358 $\pm$ 6.51E-03  | .364 $\pm$ 4.22E-03  | <b>.400</b> $\pm$ 3.67E-04  | .401 $\pm$ 3.58E-04  |
| REDDIT | 25  | .0581 $\pm$ 1.02E-03 | .0583 $\pm$ 2.78E-04 | <b>.0592</b> $\pm$ 3.07E-04 | .0596 $\pm$ 4.27E-04 |
|        | 50  | .0746 $\pm$ 1.03E-03 | .0738 $\pm$ 4.85E-03 | <b>.0774</b> $\pm$ 7.88E-04 | .0783 $\pm$ 2.60E-04 |
|        | 75  | .0845 $\pm$ 1.64E-03 | .0849 $\pm$ 8.96E-04 | <b>.0909</b> $\pm$ 5.49E-04 | .0922 $\pm$ 3.69E-04 |
|        | 100 | .0904 $\pm$ 1.35E-03 | .0911 $\pm$ 1.59E-03 | <b>.101</b> $\pm$ 6.25E-04  | .103 $\pm$ 7.14E-04  |
|        | 125 | .0946 $\pm$ 2.13E-03 | .0945 $\pm$ 3.17E-03 | <b>.109</b> $\pm$ 7.71E-04  | .111 $\pm$ 7.98E-04  |

### A.12.3 Fit as a Function of Time

Figures 8a and 8b shows the fit as a function of time for the Amazon Reviews and NELL2 tensors. The hybrid version of CP-ARLS-LEV was used for comparison in both experiments. As in section 4.3, thick lines are averages of the running max fit across 4 ALS trials, shown by the thin dotted lines. For Amazon, the STS-CP algorithm makes faster progress than CP-ARLS-LEV at all tested sample counts.

For the NELL-2 tensor, STS-CP makes slower progress than CP-ARLS-LEV for sample counts up to  $J = 163, 840$ . On average, these trials with CP-ARLS-LEV do not achieve the same final fit as STS-CP. CP-ARLS-LEV finally achieves a comparable fit to STS-CP when the former uses  $J = 196, 608$  samples, compared to  $J = 65, 536$  for our method.

### A.12.4 Speedup of STS-CP and Practical Usage Guide

**Timing Comparisons.** For each tensor, we now compare hybrid CP-ARLS-LEV and STS-CP on the time required to achieve a fixed fraction of the fit achieved by non-randomized ALS. For each tensor and rank in the set  $\{25, 50, 75, 100, 125\}$ , we ran both algorithms using a range of sample counts. We tested STS-CP on values of  $J$  from the set  $\{2^{15}x \mid 1 \leq x \leq 4\}$  for all tensors. CP-ARLS-LEV required a sample count that varied significantly between datasets to hit the required thresholds, and we report the sample counts that we tested in Table 5. Because CP-ARLS-LEV has poorer sample complexity than STS-CP, we tested a wider range of sample counts for the former algorithm.

Table 5: Tested Sample Counts for hybrid CP-ARLS-LEV

| TENSOR | VALUES OF $J$ TESTED                                                                                  |
|--------|-------------------------------------------------------------------------------------------------------|
| UBER   | $\{2^{15}x \mid x \in \{1..13\}\}$                                                                    |
| ENRON  | $\{2^{15}x \mid x \in \{1..7\}\} \cup \{10, 12, 14, 16, 18, 20, 22, 26, 30, 34, 38, 42, 46, 50, 54\}$ |
| NELL-2 | $\{2^{15}x \mid x \in \{1..7\}\}$                                                                     |
| AMAZON | $\{2^{15}x \mid x \in \{1..7\}\}$                                                                     |
| REDDIT | $\{2^{15}x \mid x \in \{1..12\}\}$                                                                    |

For each configuration of tensor, target rank  $R$ , sampling algorithm, and sample count  $J$ , we ran 4 trials using the configuration and stopping criteria in Appendix A.11. The result of each trial was a set of (time, fit) pairs. For each configuration, we linearly interpolated the pairs for each trial and averaged the resulting continuous functions over all trials. The result for each configuration was a function  $f_{\mathcal{T},R,A,J} : \mathbb{R}^+ \rightarrow [0, 1]$ . The value  $f_{\mathcal{T},R,A,J}(t)$  is the average fit at time  $t$  achieved by algorithm  $A$  to decompose tensor  $\mathcal{T}$  with target rank  $R$  using  $J$  samples per least squares solve. Finally, let

$$\text{Speedup}_{\mathcal{T},R,M} := \frac{\min_J \operatorname{argmin}_{t \geq 0} [f_{\mathcal{T},R,\text{CP-ARLS-LEV-H},J}(t) > P]}{\min_J \operatorname{argmin}_{t \geq 0} [f_{\mathcal{T},R,\text{STS-CP},J}(t) > P]}$$

be the speedup of STS-CP to over CP-ARLS-LEV (hybrid) to achieve a threshold fit  $P$  on tensor  $\mathcal{T}$  with target rank  $R$ . We let the threshold  $P$  for each tensor  $\mathcal{T}$  be a fixed fraction of the fit achieved by non-randomized ALS (see Table 4).

Figure 9 reports the speedup of STS-CP over hybrid CP-ARLS-LEV for  $P = 0.95$  on all tensors except Enron. For large tensors with over one billion nonzeros, we report a significant speedup anywhere from 1.4x to 2.0x for all tested ranks. For smaller tensors with less than 100 million nonzeros, the lower cost of each least squares solve lessens the impact of the expensive, more accurate sample selection phase of STS-CP. Despite this, STS-CP performs comparably to CP-ARLS-LEV at most ranks, with significant slowdown only at rank 25 on the smallest tensor Uber.

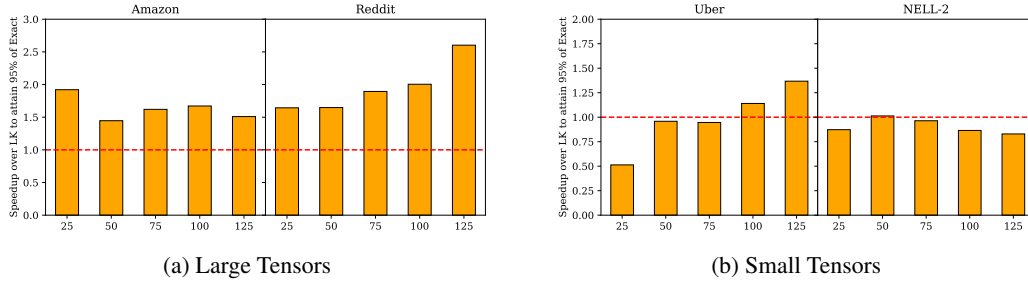

Figure 9: Speedup of STS-CP over CP-ARLS-LEV hybrid (LK) to reach 95% of the fit achieved by non-randomized ALS. Large tensors have more than 1 billion nonzero entries.

On the Enron tensor, hybrid CP-ARLS-LEV could not achieve the 95% accuracy threshold for any rank above 25 for the sample counts tested in Table 5. **STS-CP achieved the threshold accuracy for all ranks tested.** Instead, Figure 10 reports the speedup to achieve 85% of the fit of non-randomized ALS on the Enron. Beyond rank 25, our method consistently exhibits more than 2x speedup to reach the threshold.

**Guide to Sampler Selection.** Based on the performance comparisons in this section, we offer the following guide to CP decomposition algorithm selection. Our experiments demonstrate that **STS-CP offers the most benefit on sparse tensors with billions of nonzeros (Amazon and Reddit) at high target decomposition rank.** Here, the runtime of our more expensive sampling procedure is offset by reductions in the least squares solve time. For smaller tensors, our sampler may still offer significant performance benefits (Enron). In other cases (Uber, NELL-2), CP-ARLS-LEV exhibits better performance, but by small margins for rank beyond 50.



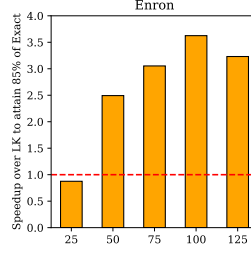

Figure 10: Speedup of STS-CP over CP-ARLS-LEV hybrid (LK) to reach 85% of the fit achieved by non-randomized ALS on the Enron Tensor.

857 STS-CP reduces the cost of each least squares solve through a sample selection process that relies on  
 858 dense linear algebra primitives (see Algorithms 3 and 4). Because these operations can be expressed  
 859 as standard BLAS calls and can be carried out in parallel (see Appendix A.10, we hypothesize that  
 860 STS-CP is favorable when GPUs or other dense linear algebra accelerators are available.

861 Because our target tensor is sparse, the least squares solve during each ALS iteration requires a sparse  
 862 matricized-tensor times Khatri-Rao product (spMTTKRP) operation. After sampling, this primitive  
 863 can reduced to sparse-matrix dense-matrix multiplication (SpMM). Development of accelerators  
 864 for these primitives is an active area of research [26, 24]. When such accelerators are available, the  
 865 lower cost of the spMTTKRP operation reduces the relative benefit provided by the STS-CP sample  
 866 selection method. We hypothesize that CP-ARLS-LEV, with its faster sample selection process  
 867 but lower sample efficiency, may retain its benefit in this case. We leave verification of these two  
 868 hypotheses as future work.
